# Supplementary material for: Circulating microvesicles and exosomes in small cell lung cancer by quantitative proteomics
Source: PubMed Central journal article supplement (PMC8903681; doi:10.1186/s12014-021-09339-5), 2022-01-07

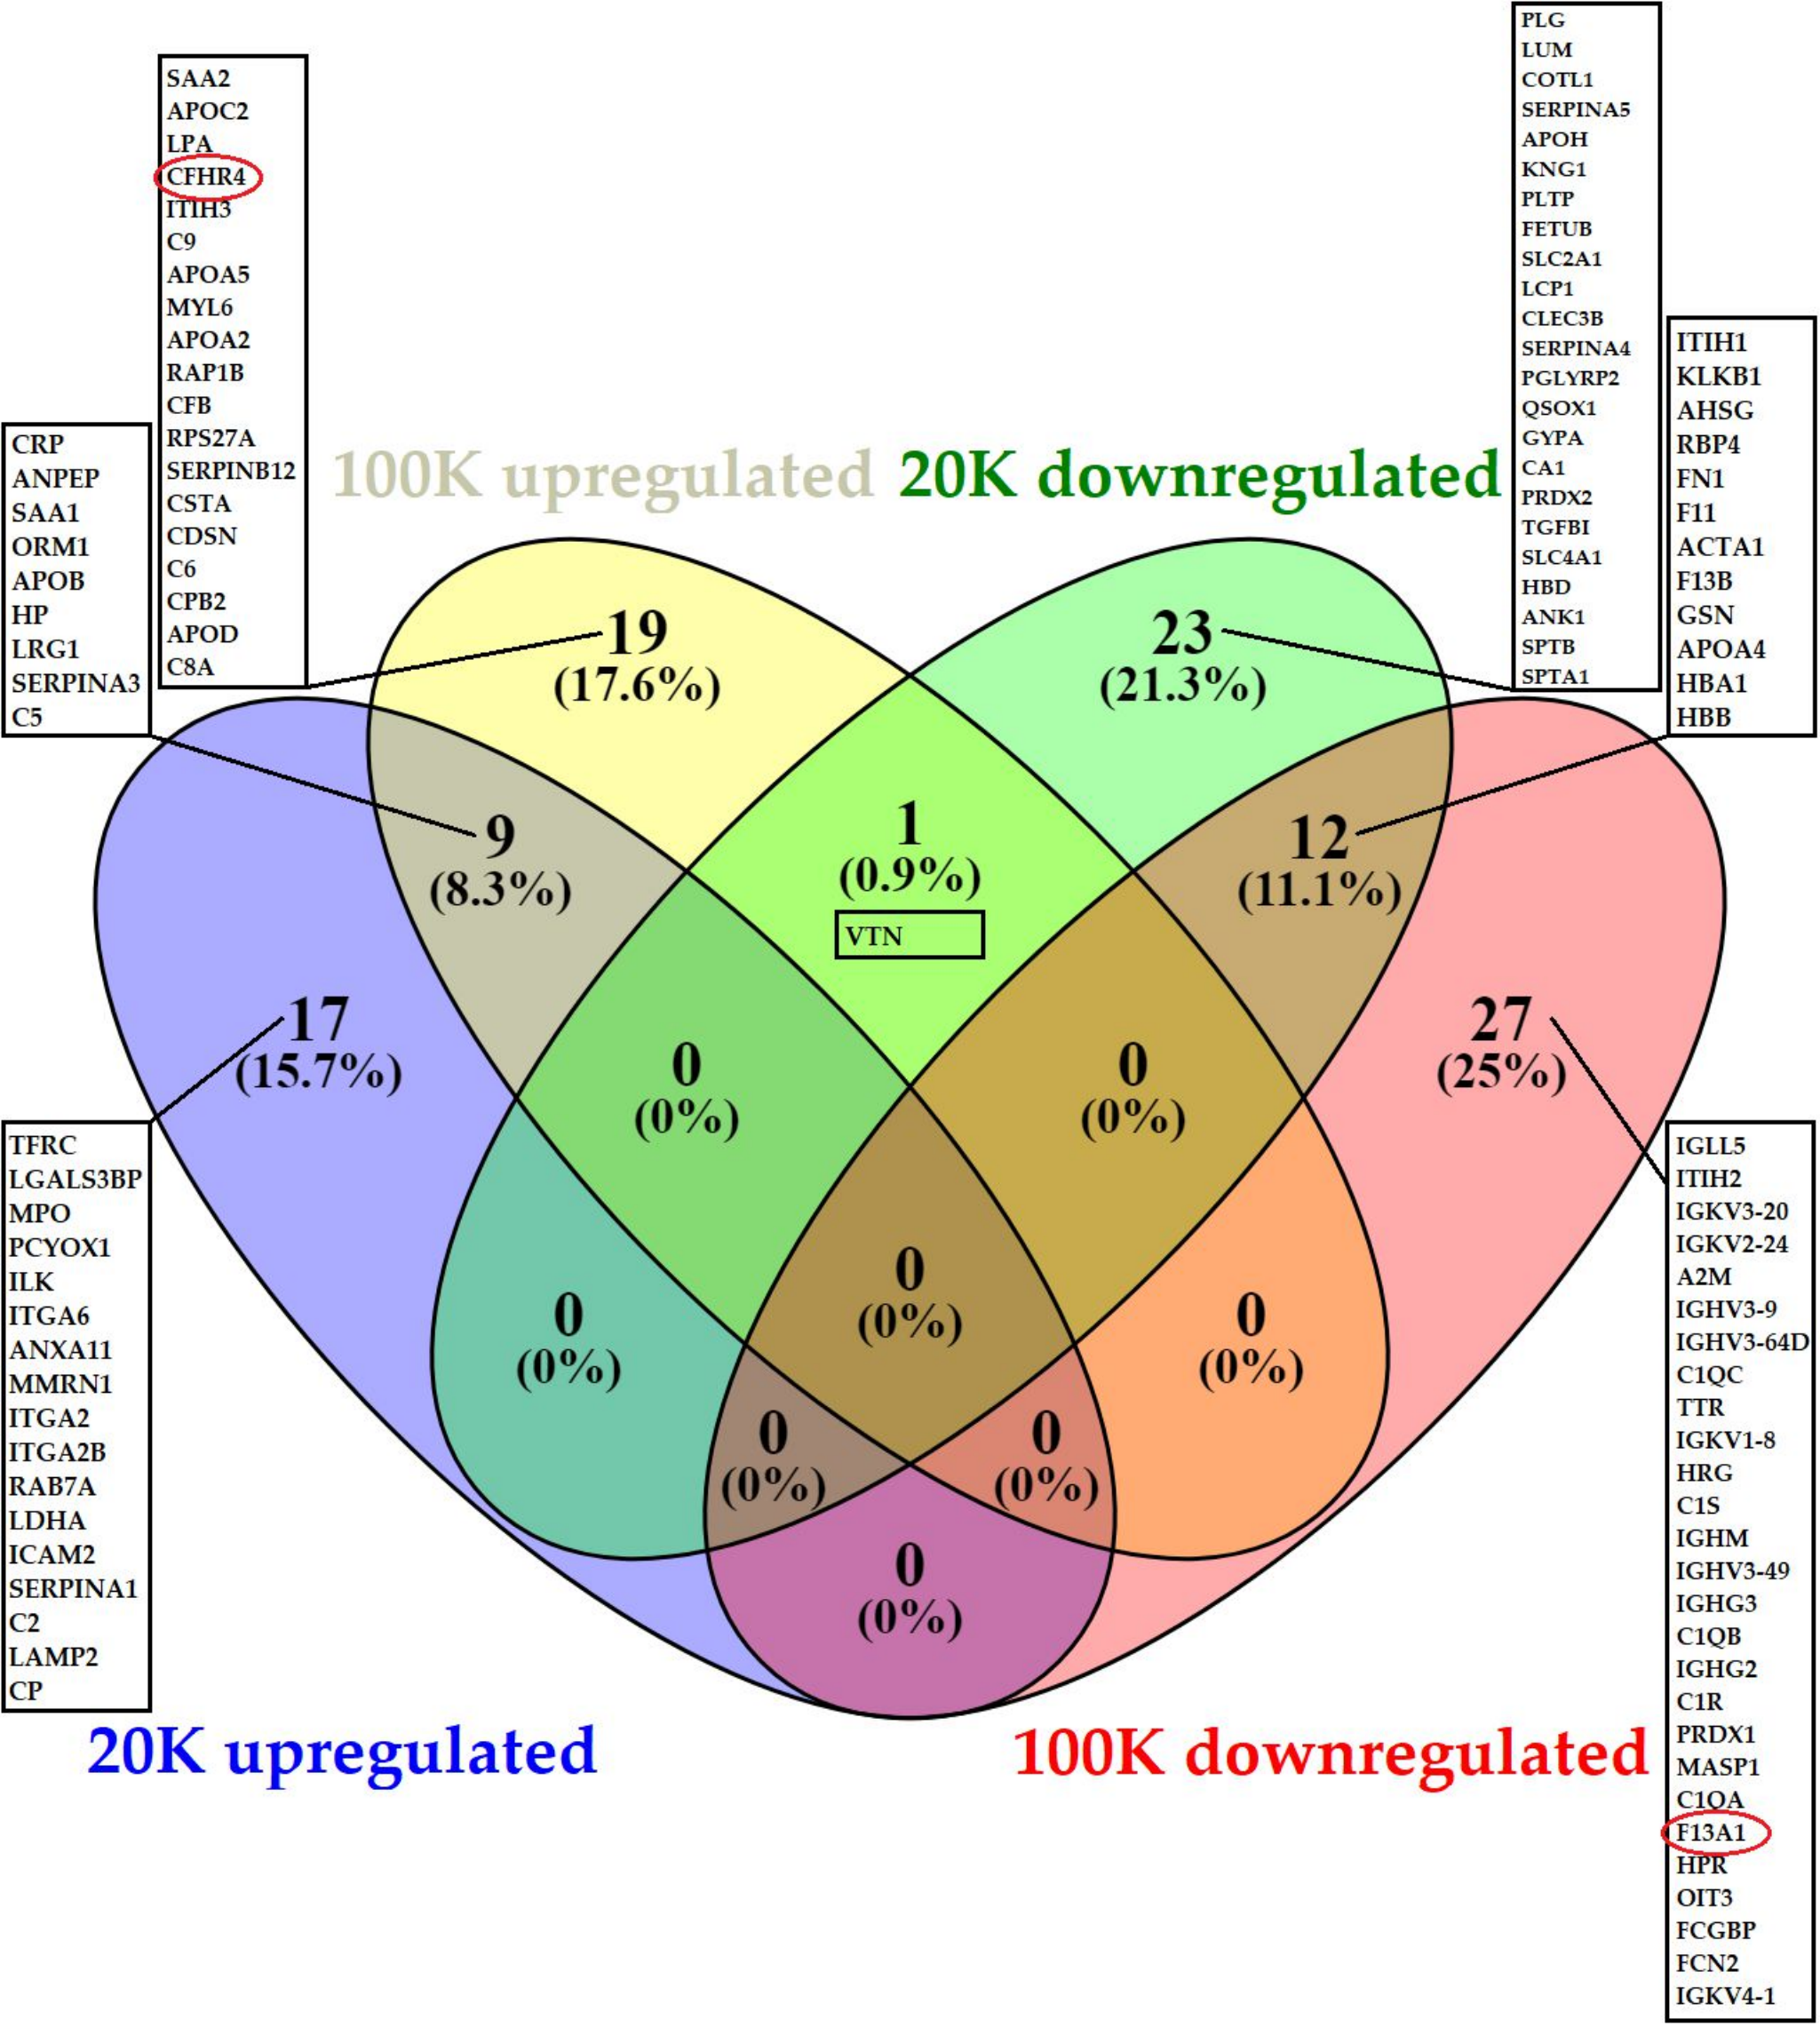

Supplement: 12014_2021_9339_MOESM1_ESM.pdf [file 12014_2021_9339_MOESM1_ESM.pdf]
