# Supplementary material for: Circulating microvesicles and exosomes in small cell lung cancer by quantitative proteomics
Source: PubMed Central journal article supplement (PMC8903681; doi:10.1186/s12014-021-09339-5), 2022-01-07
Supplement: 12014_2021_9339_MOESM2_ESM.pdf [file 12014_2021_9339_MOESM2_ESM.pdf]

**Table S1.** Top 100 proteins related to EVs from EV databases ExoCarta and Vesiclepedia

| 20K = 314 identified proteins |                                              |                         |
|-------------------------------|----------------------------------------------|-------------------------|
| Protein IDs                   | Protein names                                | T: Gene names           |
| 1 A0A0A0MS15                  | Immunoglobulin heavy variable 3-49 IGHV3-49  |                         |
| 2 A0A0B4J1V2                  | Immunoglobulin heavy variable 2-26 IGHV2-26  |                         |
| 3 A0A0C4DH33                  | Immunoglobulin heavy variable 1-24 IGHV1-24  |                         |
| 4 A0A0C4DH38                  | Immunoglobulin heavy variable 5-51 IGHV5-51  |                         |
| 5 O00194;P51159-2;P51159      | Ras-related protein Rab-27B                  | RAB27B                  |
| 6 O00299                      | Chloride intracellular channel protein CLIC1 |                         |
| 7 O00391-2;O00391             | Sulfhydryl oxidase 1                         | QSOX1                   |
| 8 O14791-2;O14791;O14791-3    | Apolipoprotein L1                            | APOL1                   |
| 9 P19105;O14950               | Myosin regulatory light chain 12A;M          | MYL12A;MYL12B           |
| 10 O43707;O43707-2;O43707-3   | Alpha-actinin-4                              | ACTN4                   |
| 11 O43866                     | CD5 antigen-like                             | CD5L                    |
| 12 O75083;O75083-3            | WD repeat-containing protein 1               | WDR1                    |
| 13 O75131;Q86YQ8-2;Q9HCH3-2   | Copine-3;Copine-8;Copine-5;Copine-           | CPNE3;CPNE8;CPNE5;CPNE2 |
| 14 O75390                     | Citrate synthase, mitochondrial              | CS                      |
| 15 O75636-2;O75636            | Ficolin-3                                    | FCN3                    |
| 16 O75882-3;O75882-2;O75882   | Attractin                                    | ATRN                    |
| 17 O95445;O95445-2            | Apolipoprotein M                             | APOM                    |
| 18 O95810                     | Serum deprivation-response protein           | SDPR                    |
| 19 O95866-4;O95866-5;O95866-  | Protein G6b                                  | G6B                     |
| 20 P00338-5;P00338-2;P00338;P | L-lactate dehydrogenase A chain              | LDHA                    |
| 21 P00387-2;P00387;P00387-3   | NADH-cytochrome b5 reductase 3;N             | CYB5R3                  |
| 22 P00450;CON__ENSEMBL:ENSE   | Ceruloplasmin                                | CP                      |
| 23 P00488                     | Coagulation factor XIII A chain              | F13A1                   |
| 24 P00491                     | Purine nucleoside phosphorylase              | PNP                     |
| 25 P00558-2;P00558            | Phosphoglycerate kinase 1                    | PGK1                    |
| 26 P00734;CON__P00735         | Prothrombin;Activation peptide frag          | F2                      |
| 27 P00736                     | Complement C1r subcomponent;Com              | C1R                     |
| 28 P00738;P00738-2            | Haptoglobin;Haptoglobin alpha chain          | HP                      |
| 29 P00739;P00739-2            | Haptoglobin-related protein                  | HPR                     |
| 30 P00742                     | Coagulation factor X;Factor X light ch       | F10                     |
| 31 P00747;Q15195              | Plasminogen;Plasmin heavy chain A;           | PLG                     |
| 32 P00748                     | Coagulation factor XII;Coagulation fa        | F12                     |
| 33 P00751;P00751-2            | Complement factor B;Complement f             | CFB                     |
| 34 P00915                     | Carbonic anhydrase 1                         | CA1                     |
| 35 P01008                     | Antithrombin-III                             | SERPINC1                |
| 36 P01009;P01009-2;P01009-3   | Alpha-1-antitrypsin;Short peptide fr         | SERPINA1                |
| 37 P01011;P01011-2;P01011-3   | Alpha-1-antichymotrypsin;Alpha-1-a           | SERPINA3                |
| 38 P01019                     | Angiotensinogen;Angiotensin-1;Angi           | AGT                     |
| 39 P01023                     | Alpha-2-macroglobulin                        | A2M                     |
| 40 P01024                     | Complement C3;Complement C3 bet              | C3                      |
| 41 P01031;CON__Q1A7A4         | Complement C5;Complement C5 bet              | C5                      |
| 42 P01040                     | Cystatin-A;Cystatin-A, N-terminally          | pCSTA                   |
| 43 P01042;P01042-2;P01042-3   | Kininogen-1;Kininogen-1 heavy chain          | KNG1                    |
| 44 P01591                     | Immunoglobulin J chain                       | IGJ                     |
| 45 P01594;P01593              | Ig kappa chain V-I region AU;Ig kappa        | IGKV1-33;IGKV1D-33      |

|    |                                   |                                                            |                   |
|----|-----------------------------------|------------------------------------------------------------|-------------------|
| 46 | P01619                            | Ig kappa chain V-III region B6                             | IGKV3-20          |
| 47 | P01743                            | Ig heavy chain V-I region HG3                              | IGHV1-46          |
| 48 | P01764                            | Ig heavy chain V-III region 23                             | IGHV3-23          |
| 49 | P01782;P0DP04                     | Ig heavy chain V-III region DOB                            | IGHV3-9;IGHV3-43D |
| 50 | P01833                            | Polymeric immunoglobulin receptor; PIGR                    |                   |
| 51 | P01834                            | Ig kappa chain C region                                    | IGKC              |
| 52 | P0DOX5;P01857                     | Ig gamma-1 chain C region                                  | IGHG1             |
| 53 | P01859                            | Ig gamma-2 chain C region                                  | IGHG2             |
| 54 | P01860                            | Ig gamma-3 chain C region                                  | IGHG3             |
| 55 | P01861                            | Ig gamma-4 chain C region                                  | IGHG4             |
| 56 | P01871;P01871-2                   | Ig mu chain C region                                       | IGHM              |
| 57 | P01876                            | Ig alpha-1 chain C region                                  | IGHA1             |
| 58 | P01889;P13747;P17693-6;P17693-7   | HLA class I histocompatibility antigen HLA-B               |                   |
| 59 | P01903;P01906                     | HLA class II histocompatibility antigen HLA-DRA            |                   |
| 60 | P02042;CON__Q3SX09;P0210          | Hemoglobin subunit delta                                   | HBD               |
| 61 | P02549-2;P02549                   | Spectrin alpha chain, erythrocytic 1                       | SPTA1             |
| 62 | P02647                            | Apolipoprotein A-I;Proapolipoprotein A-I                   | APOA1             |
| 63 | P02649;CON__Q03247                | Apolipoprotein E                                           | APOE              |
| 64 | P02654                            | Apolipoprotein C-I;Truncated apolipoprotein C-I            | APOC1             |
| 65 | P02656                            | Apolipoprotein C-III                                       | APOC3             |
| 66 | P02671;P02671-2;CON__P02671       | Fibrinogen alpha chain;Fibrinopeptide A                    | FGA               |
| 67 | P02675;CON__P02676                | Fibrinogen beta chain;Fibrinopeptide B                     | FGB               |
| 68 | P02679-2;P02679                   | Fibrinogen gamma chain                                     | FGG               |
| 69 | P02724-3;P02724-2;P02724          | Glycophorin-A                                              | GYPA              |
| 70 | P02730;P02730-2                   | Band 3 anion transport protein                             | SLC4A1            |
| 71 | P02741;P02741-2                   | C-reactive protein;C-reactive protein                      | CRP               |
| 72 | P02745                            | Complement C1q subcomponent subunit C1QA                   | C1QA              |
| 73 | P02746                            | Complement C1q subcomponent subunit C1QB                   | C1QB              |
| 74 | P02748;CON__Q3MHN2                | Complement component C9;Complement C9                      | C9                |
| 75 | P02749;CON__P17690                | Beta-2-glycoprotein 1                                      | APOH              |
| 76 | P02750                            | Leucine-rich alpha-2-glycoprotein                          | LRG1              |
| 77 | P02751-3;P02751-1;P02751-1        | Fibronectin;Anastellin;Ugl-Y1;Ugl-Y2                       | FN1               |
| 78 | P02753                            | Retinol-binding protein 4;Plasma retinol-binding protein 4 | RBP4              |
| 79 | P02760                            | Protein AMBP;Alpha-1-microglobulin                         | AMBP              |
| 80 | P02763                            | Alpha-1-acid glycoprotein 1                                | ORM1              |
| 81 | P02765                            | Alpha-2-HS-glycoprotein;Alpha-2-HS glycoprotein            | AHSG              |
| 82 | P02766;Q5U7I5                     | Transthyretin                                              | TTR               |
| 83 | P02774;P02774-3;P02774-2;P02774-1 | Vitamin D-binding protein                                  | GC                |
| 84 | P02776                            | Platelet factor 4;Platelet factor 4, short form            | PF4               |
| 85 | P02786                            | Transferrin receptor protein 1;Transferrin receptor        | TFRC              |
| 86 | P02787                            | Serotransferrin                                            | TF                |
| 87 | P02788-2;P02788                   | Lactotransferrin;Lactoferricin-H;Kalicin                   | LTF               |
| 88 | P02790                            | Hemopexin                                                  | HPX               |
| 89 | P02792                            | Ferritin light chain                                       | FTL               |
| 90 | P03951-2;P03951                   | Coagulation factor XI;Coagulation factor XI                | F11               |
| 91 | P03952                            | Plasma kallikrein;Plasma kallikrein heavy chain            | KLKB1             |
| 92 | P04003                            | C4b-binding protein alpha chain                            | C4BPA             |
| 93 | P04004;CON__Q3ZBS7                | Vitronectin;Vitronectin V65 subunit;Vitronectin            | VTN               |
| 94 | P04040                            | Catalase                                                   | CAT               |
| 95 | P04075;P04075-2                   | Fructose-bisphosphate aldolase A                           | ALDOA             |

|     |                                   |                                                   |                |
|-----|-----------------------------------|---------------------------------------------------|----------------|
| 96  | P04083                            | Annexin A1                                        | ANXA1          |
| 97  | P04114                            | Apolipoprotein B-100;Apolipoprotein APOB          |                |
| 98  | P04180                            | Phosphatidylcholine-sterol acyltransferase        | LCAT           |
| 99  | P04196                            | Histidine-rich glycoprotein                       | HRG            |
| 100 | P04217;CON__Q2KJF1                | Alpha-1B-glycoprotein                             | A1BG           |
| 101 | P04275;P04275-2                   | von Willebrand factor;von Willebrand factor       | VWF            |
| 102 | P04278;P04278-4;P04278-2;P04278-3 | Sex hormone-binding globulin                      | SHBG           |
| 103 | P04406-2;P04406                   | Glyceraldehyde-3-phosphate dehydrogenase          | GAPDH          |
| 104 | P04439;P04439-2                   | HLA class I histocompatibility antigen A2         | HLA-A          |
| 105 | P04792                            | Heat shock protein beta-1                         | HSPB1          |
| 106 | P04899;P04899-4;P04899-6;P04899-3 | Guanine nucleotide-binding protein G(I)G(S)       | GNAI2          |
| 107 | P05023-3;P05023-4;P05023;P05023-2 | Sodium/potassium-transporting ATPase              | ATP1A1         |
| 108 | P05089-2;P05089;P05089-3          | Arginase-1                                        | ARG1           |
| 109 | P05106-2;P05106-3;P05106          | Integrin beta-3                                   | ITGB3          |
| 110 | P05107                            | Integrin beta-2                                   | ITGB2          |
| 111 | P05141                            | ADP/ATP translocase 2;ADP/ATP translocase         | SLC25A5        |
| 112 | P05154                            | Plasma serine protease inhibitor                  | SERPINA5       |
| 113 | P05155-2;P05155;P05155-3;P05155-1 | Plasma protease C1 inhibitor                      | SERPING1       |
| 114 | P05156;CON__Q32PI4                | Complement factor I;Complement factor             | CFI            |
| 115 | P05160                            | Coagulation factor XIII B chain                   | F13B           |
| 116 | P05164-2;P05164;P05164-3          | Myeloperoxidase;Myeloperoxidase                   | MPO            |
| 117 | P05362                            | Intercellular adhesion molecule 1                 | ICAM1          |
| 118 | P05452;CON__Q2KIS7                | Tetranectin                                       | CLEC3B         |
| 119 | P05543;CON__Q9TT36                | Thyroxine-binding globulin                        | SERPINA7       |
| 120 | P05546                            | Heparin cofactor 2                                | SERPIND1       |
| 121 | P05556-2;P05556;P05556-5;P05556-3 | Integrin beta-1                                   | ITGB1          |
| 122 | P06276                            | Cholinesterase                                    | BCHE           |
| 123 | P06396-2;P06396-4;P06396-3        | Gelsolin                                          | GSN            |
| 124 | P06576                            | ATP synthase subunit beta, mitochondrial          | ATP5B          |
| 125 | P06681;P06681-3;P06681-2          | Complement C2;Complement C2b fragment             | C2             |
| 126 | P06702                            | Protein S100-A9                                   | S100A9         |
| 127 | P06727                            | Apolipoprotein A-IV                               | APOA4          |
| 128 | P06733;P06733-2;P09104-2          | Alpha-enolase                                     | ENO1           |
| 129 | P07225;CON__P07224                | Vitamin K-dependent protein S                     | PROS1          |
| 130 | P07339                            | Cathepsin D;Cathepsin D light chain;Cathepsin     | CTSD           |
| 131 | P07355-2;P07355;A6NMY6            | Annexin A2;Putative annexin A2-like protein       | ANXA2;ANXA2P2  |
| 132 | P07357                            | Complement component C8 alpha chain               | C8A            |
| 133 | P07358                            | Complement component C8 beta chain                | C8B            |
| 134 | P07359                            | Platelet glycoprotein Ib alpha chain;Glycoprotein | GP1BA          |
| 135 | P07360                            | Complement component C8 gamma chain               | C8G            |
| 136 | P07384                            | Calpain-1 catalytic subunit                       | CAPN1          |
| 137 | P07437;Q9BUF5;A6NNZ2              | Tubulin beta chain                                | TUBB           |
| 138 | P07737;CON__P02584                | Profilin-1                                        | PFN1           |
| 139 | P07900;P07900-2;Q58FG0;Q10888     | Heat shock protein HSP 90-alpha                   | HSP90AA1       |
| 140 | P07948-2;P07948                   | Tyrosine-protein kinase Lyn                       | LYN            |
| 141 | P07996;P07996-2;P35442;P40008     | Thrombospondin-1                                  | THBS1          |
| 142 | P08133;P08133-2                   | Annexin A6                                        | ANXA6          |
| 143 | P08134;P61586;P62745              | Rho-related GTP-binding protein RhoC              | RHOC;RHOA;RHOB |
| 144 | P08185                            | Corticosteroid-binding globulin                   | SERPINA6       |
| 145 | P08514;P08514-2;P08514-3          | Integrin alpha-IIb;Integrin alpha-IIb heavy chain | ITGA2B         |

|     |                            |                                          |                   |
|-----|----------------------------|------------------------------------------|-------------------|
| 146 | P08519                     | Apolipoprotein(a)                        | LPA               |
| 147 | P08567                     | Pleckstrin                               | PLEK              |
| 148 | P08571                     | Monocyte differentiation antigen CD      | CD14              |
| 149 | P08575-4;P08575-9;P08575-1 | Receptor-type tyrosine-protein phos      | PTPRC             |
| 150 | P08603;P08603-2;Q02985-2;C | Complement factor H                      | CFH               |
| 151 | P08697;P08697-2;CON__P28   | Alpha-2-antiplasmin                      | SERPINF2          |
| 152 | P08709-2;P08709            | Coagulation factor VII;Factor VII light  | F7                |
| 153 | P09211                     | Glutathione S-transferase P              | GSTP1             |
| 154 | P09871                     | Complement C1s subcomponent;Com          | C1S               |
| 155 | P09972                     | Fructose-bisphosphate aldolase C         | ALDOC             |
| 156 | POCOL4;POCOL4-2;CON__ENSE  | Complement C4-A;Complement C4 t          | C4A               |
| 157 | POCOL5                     | Complement C4-B;Complement C4 t          | C4B               |
| 158 | PODJI8;PODJI9-2            | Serum amyloid A-1 protein;Amyloid        | SAA1              |
| 159 | PODMV9;PODMV8;PODMV8-2     | Heat shock 70 kDa protein 1B;Heat s      | HSPA1B;HSPA1A     |
| 160 | PODOX6                     |                                          | IGHM(2)           |
| 161 | PODOX7                     |                                          | IGKC(2)           |
| 162 | PODOY3;PODOY2;POCF74;AOM   | Ig lambda-6 chain C region;Ig lambda     | IGLC6;IGLC7       |
| 163 | PODP25;PODP24;PODP23       |                                          | CALM3;CALM2;CALM1 |
| 164 | P10321;P10321-2            | HLA class I histocompatibility antigen   | HLA-C             |
| 165 | P10643                     | Complement component C7                  | C7                |
| 166 | P10809                     | 60 kDa heat shock protein, mitochor      | HSPD1             |
| 167 | P10909-4;P10909-6;P10909;P | Clusterin;Clusterin beta chain;Cluste    | CLU               |
| 168 | P11021                     | 78 kDa glucose-regulated protein         | HSPA5             |
| 169 | P11142;P11142-2;P54652     | Heat shock cognate 71 kDa protein        | HSPA8             |
| 170 | P11166                     | Solute carrier family 2, facilitated glu | SLC2A1            |
| 171 | P11169;Q8TDB8-4;Q8TDB8-2;  | Solute carrier family 2, facilitated glu | SLC2A3;SLC2A14    |
| 172 | P11277;P11277-3;P11277-2;C | Spectrin beta chain, erythrocytic        | SPTB              |
| 173 | P11597;P11597-2            | Cholesteryl ester transfer protein       | CETP              |
| 174 | P12259;CON__Q28107         | Coagulation factor V;Coagulation fac     | F5                |
| 175 | P12273                     | Prolactin-inducible protein              | PIP               |
| 176 | P12814;P12814-2;P12814-3;P | Alpha-actinin-1                          | ACTN1             |
| 177 | P13224;P13224-2            | Platelet glycoprotein Ib beta chain      | GP1BB             |
| 178 | P13473;P13473-2;P13473-3   | Lysosome-associated membrane gly         | LAMP2             |
| 179 | P13598                     | Intercellular adhesion molecule 2        | ICAM2             |
| 180 | P13671                     | Complement component C6                  | C6                |
| 181 | P13796;P13796-2;Q14651     | Plastin-2                                | LCP1              |
| 182 | P14618;P14618-3;P14618-2;P | Pyruvate kinase PKM                      | PKM               |
| 183 | P14770                     | Platelet glycoprotein IX                 | GP9               |
| 184 | P14923;P35222              | Junction plakoglobin                     | JUP               |
| 185 | P15144                     | Aminopeptidase N                         | ANPEP             |
| 186 | P15169;CON__Q2KJ83         | Carboxypeptidase N catalytic chain       | CPN1              |
| 187 | P15924;P15924-2;P15924-3   | Desmoplakin                              | DSP               |
| 188 | P16157-14;P16157-8;P16157- | Ankyrin-1                                | ANK1              |
| 189 | P16284-5;P16284-3;P16284-4 | Platelet endothelial cell adhesion mc    | PECAM1            |
| 190 | P16671;P16671-4;P16671-3;P | Platelet glycoprotein 4                  | CD36              |
| 191 | P17301                     | Integrin alpha-2                         | ITGA2             |
| 192 | P18206;P18206-2;P18206-3   | Vinculin                                 | VCL               |
| 193 | P18428                     | Lipopolysaccharide-binding protein       | LBP               |
| 194 | P19652                     | Alpha-1-acid glycoprotein 2              | ORM2              |
| 195 | P19823                     | Inter-alpha-trypsin inhibitor heavy cl   | ITI2              |

|     |                            |                                        |                |
|-----|----------------------------|----------------------------------------|----------------|
| 196 | P19827;P19827-2;P19827-3;C | Inter-alpha-trypsin inhibitor heavy cl | ITIH1          |
| 197 | P20701-2;P20701;P20701-3   | Integrin alpha-L                       | ITGAL          |
| 198 | P20742;P20742-2            | Pregnancy zone protein                 | PZP            |
| 199 | P20851-2;P20851            | C4b-binding protein beta chain         | C4BPB          |
| 200 | P21333-2;P21333            | Filamin-A                              | FLNA           |
| 201 | P22352                     | Glutathione peroxidase 3               | GPX3           |
| 202 | P22792                     | Carboxypeptidase N subunit 2           | CPN2           |
| 203 | P23142;P23142-2;P23142-3;C | Fibulin-1                              | FBLN1          |
| 204 | P23229-4;P23229-2;P23229-5 | Integrin alpha-6;Integrin alpha-6 hea  | ITGA6          |
| 205 | P23528                     | Cofilin-1                              | CFL1           |
| 206 | P25311                     | Zinc-alpha-2-glycoprotein              | AZGP1          |
| 207 | P25705-2;P25705;P25705-3   | ATP synthase subunit alpha, mitochc    | ATP5A1         |
| 208 | P26038;P35241-3            | Moesin                                 | MSN            |
| 209 | P27105;P27105-2            | Erythrocyte band 7 integral membra     | STOM           |
| 210 | P27169                     | Serum paraoxonase/arylesterase 1       | PON1           |
| 211 | P27824-2;P27824;P27824-3   | Calnexin                               | CANX           |
| 212 | P29622                     | Kallistatin                            | SERPINA4       |
| 213 | P30041                     | Peroxiredoxin-6                        | PRDX6          |
| 214 | P30101                     | Protein disulfide-isomerase A3         | PDIA3          |
| 215 | P30740;P30740-2;P50452-2;C | Leukocyte elastase inhibitor           | SERPINB1       |
| 216 | P31151;Q86SG5              | Protein S100-A7;Protein S100-A7A       | S100A7;S100A7A |
| 217 | P31944                     | Caspase-14;Caspase-14 subunit p17,     | CASP14         |
| 218 | P32119                     | Peroxiredoxin-2                        | PRDX2          |
| 219 | P35542                     | Serum amyloid A-4 protein              | SAA4           |
| 220 | P35579;P35579-2;P35749-4;P | Myosin-9                               | MYH9           |
| 221 | P35858;P35858-2            | Insulin-like growth factor-binding pr  | IGFALS         |
| 222 | P37802;P37802-2            | Transgelin-2                           | TAGLN2         |
| 223 | P43251-4;P43251;P43251-3;P | Biotinidase                            | BTD            |
| 224 | P43304-2;P43304            | Glycerol-3-phosphate dehydrogenas      | GPD2           |
| 225 | P43652;CON__REFSEQ:XP_58   | Afamin                                 | AFM            |
| 226 | P47755                     | F-actin-capping protein subunit alph   | CAPZA2         |
| 227 | P48735-2;P48735            | Isocitrate dehydrogenase [NADP], m     | IDH2           |
| 228 | P50148;O95837              | Guanine nucleotide-binding protein     | GNAQ           |
| 229 | P50395-2;P50395            | Rab GDP dissociation inhibitor beta    | GD12           |
| 230 | P50995-2;P50995            | Annexin A11                            | ANXA11         |
| 231 | P51149                     | Ras-related protein Rab-7a             | RAB7A          |
| 232 | P51884                     | Lumican                                | LUM            |
| 233 | P52565;P52565-2            | Rho GDP-dissociation inhibitor 1       | ARHGDI1        |
|     | P52566                     | Rho GDP-dissociation inhibitor 2       | ARHGDI2        |
|     | P52907                     | F-actin-capping protein subunit alph   | CAPZA1         |
|     | P55056                     | Apolipoprotein C-IV                    | APOC4          |
|     | P55058-3;P55058-4;P55058-2 | Phospholipid transfer protein          | PLTP           |
|     | P55072                     | Transitional endoplasmic reticulum     | TRAF3IP1       |
|     | P55209-3;P55209-2;P55209   | Nucleosome assembly protein 1-like     | NAP1L1         |
|     | P60033                     | CD81 antigen                           | CD81           |
|     | P60174;P60174-1;P60174-4   | Triosephosphate isomerase              | TPI1           |
|     | P60709;P63261;Q9BYX7       | Actin, cytoplasmic 1;Actin, cytoplas   | ACTB;ACTG1     |
|     | P61106                     | Ras-related protein Rab-14             | RAB14          |
|     | P61158                     | Actin-related protein 3                | ACTR3          |
|     | P61224;P61224-3;P61224-4;A | Ras-related protein Rap-1b;Ras-relat   | RAP1B          |

|                            |                                             |                         |
|----------------------------|---------------------------------------------|-------------------------|
| P61626                     | Lysozyme C                                  | LYZ                     |
| P62258-2;P62258            | 14-3-3 protein epsilon                      | YWHAE                   |
| P62805                     | Histone H4                                  | HIST1H4A                |
| P62873;P62873-2            | Guanine nucleotide-binding protein gamma    | GNB1                    |
| P62879;P62879-2            | Guanine nucleotide-binding protein gamma    | GNB2                    |
| P62937;P62937-2            | Peptidyl-prolyl cis-trans isomerase A       | PPIA                    |
| P63104;P63104-2            | 14-3-3 protein zeta/delta                   | YWHAZ                   |
| P67936;P67936-2            | Tropomyosin alpha-4 chain                   | TPM4                    |
| P68104-2;Q5VTE0;P68104     | Elongation factor 1-alpha 1;Putative        | EEF1A1;EEF1A1P5         |
| P68133;P68032;P63267;P627  | Actin, alpha skeletal muscle;Actin, al      | ACTA1;ACTC1;ACTG2;ACTA2 |
| P68366-2;P68366            | Tubulin alpha-4A chain                      | TUBA4A                  |
| P68871                     | Hemoglobin subunit beta;LVV-hemo            | HBB                     |
| P69905                     | Hemoglobin subunit alpha                    | HBA1                    |
| Q00325-2;Q00325            | Phosphate carrier protein, mitochon         | SLC25A3                 |
| Q00610-2;Q00610;P53675-2;f | Clathrin heavy chain 1                      | CLTC                    |
| Q01518-2;Q01518            | Adenylyl cyclase-associated protein gamma   | CAP1                    |
| Q02413;Q02413-2            | Desmoglein-1                                | DSG1                    |
| Q06033;Q06033-2;CON__Q0    | Inter-alpha-trypsin inhibitor heavy chain I | ITI3                    |
| Q08188                     | Protein-glutamine gamma-glutamyl            | TGM3                    |
| Q08380                     | Galectin-3-binding protein                  | LGALS3BP                |
| Q08431-3;Q08431-4;Q08431;  | Lactadherin;Lactadherin short form;f        | MFGE8                   |
| Q08554-2;Q08554            | Desmocollin-1                               | DSC1                    |
| Q12913;Q12913-2            | Receptor-type tyrosine-protein phosphatase  | PTPRJ                   |
| Q13201;Q13201-2            | Multimerin-1;Platelet glycoprotein Ib       | MMRN1                   |
| Q13418;Q13418-2;Q13418-3   | Integrin-linked protein kinase              | ILK                     |
| Q13576;Q13576-2            | Ras GTPase-activating-like protein IC       | IQGAP2                  |
| Q13790                     | Apolipoprotein F                            | APOF                    |
| Q14019                     | Coactosin-like protein                      | COTL1                   |
| Q14165                     | Malectin                                    | MLEC                    |
| Q14344;Q14344-2            | Guanine nucleotide-binding protein gamma    | GNA13                   |
| Q14520-2;Q14520            | Hyaluronan-binding protein 2;Hyalur         | HABP2                   |
| Q14624-3;Q14624-2;Q14624;  | Inter-alpha-trypsin inhibitor heavy chain I | ITI4                    |
| Q14766;Q14766-4;Q14766-3;  | Latent-transforming growth factor beta      | LTBP1                   |
| Q15404-2;Q15404            | Ras suppressor protein 1                    | RSU1                    |
| Q15431                     | Synaptonemal complex protein 1              | SYCP1                   |
| Q15485-2;Q15485            | Ficolin-2                                   | FCN2                    |
| Q15517                     | Corneodesmosin                              | CDSN                    |
| Q15582                     | Transforming growth factor-beta-inhibitor   | TGFBI                   |
| Q15758;Q15758-3;Q15758-2   | Neutral amino acid transporter B(0)         | SLC1A5                  |
| Q15762                     | CD226 antigen                               | CD226                   |
| Q15907;Q15907-2;P62491-2;f | Ras-related protein Rab-11B;Ras-rel         | RAB11B;RAB11A           |
| Q16610;Q16610-2;Q16610-4;  | Extracellular matrix protein 1              | ECM1                    |
| Q4KMQ2-3;Q4KMQ2;Q4KMQ      | Anoctamin-6                                 | ANO6                    |
| Q6Q788                     | Apolipoprotein A-V                          | APOA5                   |
| Q7Z406-4;Q7Z406;Q7Z406-6;f | Myosin-14                                   | MYH14                   |
| Q86UX7-2;Q86UX7;Q9BQL6-3   | Fermitin family homolog 3                   | FERMT3                  |
| Q8TDL5;Q8TDL5-2            | BPI fold-containing family B member         | BPIFB1                  |
| Q8WWI5-3;Q8WWI5-2;Q8WV     | Choline transporter-like protein 1          | SLC44A1                 |
| Q8WWZ8                     | Oncoprotein-induced transcript 3 protein    | OIT3                    |
| Q92954-5;Q92954-6;Q92954-  | Proteoglycan 4;Proteoglycan 4 C-ter         | PRG4                    |

|                            |                                                        |           |
|----------------------------|--------------------------------------------------------|-----------|
| Q93084-4;Q93084-2;Q93084-  | Sarcoplasmic/endoplasmic reticulum ATPase              | ATP2A3    |
| Q96DZ9-4;Q96DZ9-5;Q96DZ9-  | CKLF-like MARVEL transmembrane domain containing 5     | CMTM5     |
| Q96IY4;Q96IY4-2            | Carboxypeptidase B2                                    | CPB2      |
| Q96KN2                     | Beta-Ala-His dipeptidase                               | CNDP1     |
| Q96P63;Q96P63-2            | Serpin B12                                             | SERPINB12 |
| Q96PD5-2;Q96PD5;CON__EN    | N-acetylmuramoyl-L-alanine amidase                     | PGLYRP2   |
| Q9H0U4;Q92928              | Ras-related protein Rab-1B                             | RAB1B     |
| Q9H299                     | SH3 domain-binding glutamic acid-rich domain protein 1 | SH3BGRL3  |
| Q9H4M9                     | EH domain-containing protein 1                         | EHD1      |
| Q9HBI1-3;Q9HBI1;Q9HBI1-2;C | Beta-parvin                                            | PARVB     |
| Q9UBW5;Q9UBW5-3;Q9UBW      | Bridging integrator 2                                  | BIN2      |
| Q9UGM5;Q9UGM5-2            | Fetuin-B                                               | FETUB     |
| Q9UHG3;Q9UHG3-2            | Prenylcysteine oxidase 1                               | PCYOX1    |
| Q9UK55                     | Protein Z-dependent protease inhibitor 1               | SERPINA10 |
| Q9ULV4;Q9ULV4-2;Q9ULV4-3   | Coronin-1C                                             | CORO1C    |
| Q9Y277;Q9Y277-2            | Voltage-dependent anion-selective chloride channel 3   | VDAC3     |
| Q9Y490;Q9Y4G6              | Talin-1                                                | TLN1      |
| Q9Y613                     | FH1/FH2 domain-containing protein 1                    | FHOD1     |
| Q9Y624;Q9Y624-2            | Junctional adhesion molecule A                         | F11R      |

#### 100K = 233 identified proteins

| Protein IDs   | Protein names                           | T: Gene names |
|---------------|-----------------------------------------|---------------|
| 1 A0A075B6J9  | Immunoglobulin lambda variable 2-1      | IGLV2-18      |
| 2 A0A075B6K4  | Immunoglobulin lambda variable 3-1      | IGLV3-10      |
| 3 A0A087WW87  | Immunoglobulin kappa variable 2-40      | IGKV2-40      |
| 4 A0A0A0MRZ8  | Immunoglobulin kappa variable 3D-1      | IGKV3D-11     |
| 5 A0A0A0MS15  | Immunoglobulin heavy variable 3-49      | IGHV3-49      |
| 6 A0A0B4J1U7  | Immunoglobulin heavy variable 6-1       | IGHV6-1       |
| 7 A0A0B4J1Y9  | Immunoglobulin heavy variable 3-72      | IGHV3-72      |
| 8 A0A0C4DH31  | Immunoglobulin heavy variable 1-18      | IGHV1-18      |
| 9 A0A0C4DH38  | Immunoglobulin heavy variable 5-51      | IGHV5-51      |
| 10 A0A0C4DH43 | Immunoglobulin heavy variable 2-70      | IGHV2-70D     |
| 11 A0A0C4DH67 | Immunoglobulin kappa variable 1-8       | IGKV1-8       |
| 12 A0A0C4DH68 | Immunoglobulin kappa variable 2-24      | IGKV2-24      |
| 13 A0A0J9YX35 | Immunoglobulin heavy variable 3-64      | IGHV3-64D     |
| 14 O00187     | Mannan-binding lectin serine protease 2 | MASP2         |
| 15 O14791     | Apolipoprotein L1                       | APOL1         |
| 16 O43866     | CD5 antigen-like                        | CD5L          |
| 17 O75636     | Ficolin-3                               | FCN3          |
| 18 O95445     | Apolipoprotein M                        | APOM          |
| 19 P00450     | Ceruloplasmin                           | CP            |
| 20 P00488     | Coagulation factor XIII A chain         | F13A1         |
| 21 P00734     | Prothrombin                             | F2            |
| 22 P00736     | Complement C1r subcomponent             | C1R           |
| 23 P00738     | Haptoglobin                             | HP            |
| 24 P00739     | Haptoglobin-related protein             | HPR           |
| 25 P00740     | Coagulation factor IX                   | F9            |
| 26 P00747     | Plasminogen                             | PLG           |
| 27 P00748     | Coagulation factor XII                  | F12           |
| 28 P00751     | Complement factor B                     | CFB           |

|           |                                             |          |
|-----------|---------------------------------------------|----------|
| 29 P01008 | Antithrombin-III                            | SERPINC1 |
| 30 P01009 | Alpha-1-antitrypsin                         | SERPINA1 |
| 31 P01011 | Alpha-1-antichymotrypsin                    | SERPINA3 |
| 32 P01019 | Angiotensinogen                             | AGT      |
| 33 P01023 | Alpha-2-macroglobulin                       | A2M      |
| 34 P01024 | Complement C3                               | C3       |
| 35 P01031 | Complement C5                               | C5       |
| 36 P01034 | Cystatin-C                                  | CST3     |
| 37 P01040 | Cystatin-A                                  | CSTA     |
| 38 P01042 | Kininogen-1                                 | KNG1     |
| 39 P01591 | Immunoglobulin J chain                      | IGJ      |
| 40 P01594 | Immunoglobulin kappa variable 1-33 IGKV1-33 |          |
| 41 P01599 | Immunoglobulin kappa variable 1-17 IGKV1-17 |          |
| 42 P01619 | Immunoglobulin kappa variable 3-20 IGKV3-20 |          |
| 43 P01701 | Immunoglobulin lambda variable 1-5 IGLV1-51 |          |
| 44 P01703 | Immunoglobulin lambda variable 1-4 IGLV1-40 |          |
| 45 P01743 | Immunoglobulin heavy variable 1-46 IGHV1-46 |          |
| 46 P01782 | Immunoglobulin heavy variable 3-9 IGHV3-9   |          |
| 47 P01833 | Polymeric immunoglobulin receptor           | PIGR     |
| 48 P01834 | Immunoglobulin kappa constant               | IGKC     |
| 49 P01859 | Immunoglobulin heavy constant gamma 2       | IGHG2    |
| 50 P01860 | Immunoglobulin heavy constant gamma 3       | IGHG3    |
| 51 P01861 | Immunoglobulin heavy constant gamma 4       | IGHG4    |
| 52 P01871 | Immunoglobulin heavy constant mu            | IGHM     |
| 53 P01876 | Immunoglobulin heavy constant alpha 1       | IGHA1    |
| 54 P02647 | Apolipoprotein A-I                          | APOA1    |
| 55 P02649 | Apolipoprotein E                            | APOE     |
| 56 P02652 | Apolipoprotein A-II                         | APOA2    |
| 57 P02654 | Apolipoprotein C-I                          | APOC1    |
| 58 P02655 | Apolipoprotein C-II                         | APOC2    |
| 59 P02656 | Apolipoprotein C-III                        | APOC3    |
| 60 P02671 | Fibrinogen alpha chain                      | FGA      |
| 61 P02675 | Fibrinogen beta chain                       | FGB      |
| 62 P02679 | Fibrinogen gamma chain                      | FGG      |
| 63 P02730 | Band 3 anion transport protein              | SLC4A1   |
| 64 P02741 | C-reactive protein                          | CRP      |
| 65 P02743 | Serum amyloid P-component                   | APCS     |
| 66 P02745 | Complement C1q subcomponent subunit C1QA    |          |
| 67 P02746 | Complement C1q subcomponent subunit C1QB    |          |
| 68 P02747 | Complement C1q subcomponent subunit C1QC    |          |
| 69 P02748 | Complement component C9                     | C9       |
| 70 P02749 | Beta-2-glycoprotein 1                       | APOH     |
| 71 P02750 | Leucine-rich alpha-2-glycoprotein           | LRG1     |
| 72 P02751 | Fibronectin                                 | FN1      |
| 73 P02753 | Retinol-binding protein 4                   | RBP4     |
| 74 P02760 | Protein AMBP                                | AMBP     |
| 75 P02763 | Alpha-1-acid glycoprotein 1                 | ORM1     |
| 76 P02765 | Alpha-2-HS-glycoprotein                     | AHSG     |
| 77 P02766 | Transthyretin                               | TTR      |
| 78 P02774 | Vitamin D-binding protein                   | GC       |



|     |        |                                      |          |
|-----|--------|--------------------------------------|----------|
| 79  | P02776 | Platelet factor 4                    | PF4      |
| 80  | P02786 | Transferrin receptor protein 1       | TFRC     |
| 81  | P02787 | Serotransferrin                      | TF       |
| 82  | P02788 | Lactotransferrin                     | LTF      |
| 83  | P02790 | Hemopexin                            | HPX      |
| 84  | P02792 | Ferritin light chain                 | FTL      |
| 85  | P03951 | Coagulation factor XI                | F11      |
| 86  | P03952 | Plasma kallikrein                    | KLKB1    |
| 87  | P04003 | C4b-binding protein alpha chain      | C4BPA    |
| 88  | P04004 | Vitronectin                          | VTN      |
| 89  | P04075 | Fructose-bisphosphate aldolase A     | ALDOA    |
| 90  | P04114 | Apolipoprotein B-100                 | APOB     |
| 91  | P04180 | Phosphatidylcholine-sterol acyltrans | LCAT     |
| 92  | P04196 | Histidine-rich glycoprotein          | HRG      |
| 93  | P04217 | Alpha-1B-glycoprotein                | A1BG     |
| 94  | P04275 | von Willebrand factor                | VWF      |
| 95  | P04406 | Glyceraldehyde-3-phosphate dehydr    | GAPDH    |
| 96  | P04430 | Immunoglobulin kappa variable 1-16   | IGKV1-16 |
| 97  | P04792 | Heat shock protein beta-1            | HSPB1    |
| 98  | P05090 | Apolipoprotein D                     | APOD     |
| 99  | P05106 | Integrin beta-3                      | ITGB3    |
| 100 | P05109 | Protein S100-A8                      | S100A8   |
| 101 | P05154 | Plasma serine protease inhibitor     | SERPINA5 |
| 102 | P05155 | Plasma protease C1 inhibitor         | SERPING1 |
| 103 | P05156 | Complement factor I chain            | CFI      |
| 104 | P05160 | Coagulation factor XIII B chain      | F13B     |
| 105 | P05452 | Tetranectin                          | CLEC3B   |
| 106 | P05543 | Thyroxine-binding globulin           | SERPINA7 |
| 107 | P05546 | Heparin cofactor 2                   | SERPIND1 |
| 108 | P06312 | Immunoglobulin kappa variable 4-1    | IGKV4-1  |
| 109 | P06396 | Gelsolin                             | GSN      |
| 110 | P06681 | Complement C2 fragment               | C2       |
| 111 | P06702 | Protein S100-A9                      | S100A9   |
| 112 | P06727 | Apolipoprotein A-IV                  | APOA4    |
| 113 | P06733 | Alpha-enolase                        | ENO1     |
| 114 | P07225 | Vitamin K-dependent protein S        | PROS1    |
| 115 | P07339 | Cathepsin D                          | CTSD     |
| 116 | P07355 | Annexin A2                           | ANXA2    |
| 117 | P07357 | Complement component C8 alpha cl     | C8A      |
| 118 | P07358 | Complement component C8 beta ch      | C8B      |
| 119 | P07360 | Complement component C8 gamma        | C8G      |
| 120 | P08185 | Corticosteroid-binding globulin      | SERPINA6 |
| 121 | P08514 | Integrin alpha-lib                   | ITGA2B   |
| 122 | P08519 | Apolipoprotein(a)                    | LPA      |
| 123 | P08571 | Monocyte differentiation antigen CD  | CD14     |
| 124 | P08603 | Complement factor H                  | CFH      |
| 125 | P08697 | Alpha-2-antiplasmin                  | SERPINF2 |
| 126 | P09871 | Complement C1s subcomponent          | C1S      |
| 127 | P0C0L4 | Complement C4-A                      | C4A      |
| 128 | P0C0L5 | Complement C4-B                      | C4B      |

|     |        |                                              |          |
|-----|--------|----------------------------------------------|----------|
| 129 | Q71UI9 | Histone H2A.V                                | H2AZ2    |
| 130 | PODJI8 | Serum amyloid A-1 protein                    | SAA1     |
| 131 | PODJI9 | Serum amyloid A-2 protein                    | SAA2     |
| 132 | PODOX2 | Immunoglobulin alpha-2 heavy chain           | IGHA2    |
| 133 | PODOX3 | Immunoglobulin delta heavy chain             | IGHD     |
| 134 | P01857 | Ig gamma-1 chain C region                    | IGHG1    |
| 135 | PODOX6 | Immunoglobulin mu heavy chain                | IGHM(2)  |
| 136 | PODOX7 | Immunoglobulin kappa light chain             | IGKC(2)  |
| 137 | B9A064 | Immunoglobulin lambda-like polypeptide       | IGLL5    |
| 138 | POCF74 | Ig lambda-6 chain C region                   | IGLC6    |
| 139 | P10599 | Thioredoxin                                  | TXN      |
| 140 | P10643 | Complement component C7                      | C7       |
| 141 | P10909 | Clusterin                                    | CLU      |
| 142 | P11021 | Endoplasmic reticulum chaperone BiP          | HSPA5    |
| 143 | P11142 | Heat shock cognate 71 kDa protein            | HSPA8    |
| 144 | P11166 | Solute carrier family 2                      | SLC2A1   |
| 145 | P11532 | Dystrophin                                   | DMD      |
| 146 | P11597 | Cholesteryl ester transfer protein           | CETP     |
| 147 | P12259 | Coagulation factor V                         | F5       |
| 148 | P12273 | Prolactin-inducible protein                  | PIP      |
| 149 | P13671 | Complement component C6                      | C6       |
| 150 | P14923 | Junction plakoglobin                         | JUP      |
| 151 | P15144 | Aminopeptidase N                             | ANPEP    |
| 152 | P15814 | Immunoglobulin lambda-like polypeptide       | IGLL1    |
| 153 | P15924 | Desmoplakin                                  | DSP      |
| 154 | P16671 | Platelet glycoprotein 4                      | CD36     |
| 155 | P18428 | Lipopolysaccharide-binding protein           | LBP      |
| 156 | P19440 | Glutathione hydrolase 1 proenzyme            | GGT1     |
| 157 | P19652 | Alpha-1-acid glycoprotein 2                  | ORM2     |
| 158 | P19823 | Inter-alpha-trypsin inhibitor heavy chain I  | ITIH2    |
| 159 | P19827 | Inter-alpha-trypsin inhibitor heavy chain II | ITIH1    |
| 160 | P20073 | Annexin A7                                   | ANXA7    |
| 161 | Q9NRW1 | Ras-related protein Rab-6B                   | RAB6B    |
| 162 | P20851 | C4b-binding protein beta chain               | C4BPB    |
| 163 | P21333 | Filamin-A                                    | FLNA     |
| 164 | P22352 | Glutathione peroxidase 3                     | GPX3     |
| 165 | P22792 | Carboxypeptidase N subunit 2                 | CPN2     |
| 166 | P23083 | Immunoglobulin heavy variable 1-2            | IGHV1-2  |
| 167 | P23142 | Fibulin-1                                    | FBLN1    |
| 168 | P25311 | Zinc-alpha-2-glycoprotein                    | AZGP1    |
| 169 | P27105 | Erythrocyte band 7 integral membrane protein | STOM     |
| 170 | P27169 | Serum paraoxonase/arylesterase 1             | PON1     |
| 171 | P27918 | Properdin                                    | CFP      |
| 172 | P29508 | Serpin B3                                    | SERPINB3 |
| 173 | P29622 | Kallistatin                                  | SERPINA4 |
| 174 | P29972 | Aquaporin-1                                  | AQP1     |
| 175 | P31151 | Protein S100-A7                              | S100A7   |
| 176 | P31944 | Caspase-14                                   | CASP14   |
| 177 | P35542 | Serum amyloid A-4 protein                    | SAA4     |
| 178 | P35579 | Myosin-9                                     | MYH9     |

|                |                                                                                        |          |
|----------------|----------------------------------------------------------------------------------------|----------|
| 179 P35858     | Insulin-like growth factor-binding protein 3<br>acid labile subunit                    | IGFBP3   |
| 180 P36955     | Pigment epithelium-derived factor                                                      | SERPINF1 |
| 181 P36980     | Complement factor H-related protein 2                                                  | CFHR2    |
| 182 P43652     | Afamin                                                                                 | AFM      |
| 183 P48740     | Mannan-binding lectin serine protease 1                                                | MASP1    |
| 184 P49908     | Selenoprotein P                                                                        | SEPP1    |
| 185 P51884     | Lumican                                                                                | LUM      |
| 186 P55056     | Apolipoprotein C-IV                                                                    | APOC4    |
| 187 P55058     | Phospholipid transfer protein                                                          | PLTP     |
| 188 P60660     | Myosin light polypeptide 6                                                             | MYL6     |
| 189 P60709     | Actin, cytoplasmic 1                                                                   | ACTB     |
| 190 P61224     | Ras-related protein Rap-1b                                                             | RAP1B    |
| 191 P61626     | Lysozyme C                                                                             | LYZ      |
| 192 P62805     | Histone H4                                                                             | HIST1H4A |
| 193 P62937     | Peptidyl-prolyl cis-trans isomerase A                                                  | PPIA     |
| 194 P62979     | Ubiquitin-40S ribosomal protein S27                                                    | RPS27A   |
| 195 P63104     | 14-3-3 protein zeta/delta                                                              | YWHAZ    |
| 196 P68133     | Actin, alpha skeletal muscle                                                           | ACTA1    |
| 197 P68871     | Hemoglobin subunit beta                                                                | HBB      |
| 198 P69905     | Hemoglobin subunit alpha                                                               | HBA1     |
| 199 P78509     | Reelin                                                                                 | RELN     |
| 200 P80108     | Phosphatidylinositol-glycan-specific phospholipase C                                   | GPLD1    |
| 201 A0A075B6K5 | Immunoglobulin lambda variable 3-5                                                     | IGLV3-5  |
| 202 P81605     | Dermcidin                                                                              | DCD      |
| 203 Q01469     | Fatty acid-binding protein 5                                                           | FABP5    |
| 204 Q02413     | Desmoglein-1                                                                           | DSG1     |
| 205 Q06033     | Inter-alpha-trypsin inhibitor heavy chain 3                                            | ITIH3    |
| 206 Q06830     | Peroxiredoxin-1                                                                        | PRDX1    |
| 207 Q08188     | Protein-glutamine gamma-glutamyl transferase 3                                         | TGM3     |
| 208 Q08380     | Galectin-3-binding protein                                                             | LGALS3BP |
| 209 Q08554     | Desmocollin-1                                                                          | DSC1     |
| 210 Q14520     | Hyaluronan-binding protein 2                                                           | HABP2    |
| 211 Q14624     | Inter-alpha-trypsin inhibitor heavy chain 4                                            | ITIH4    |
| 212 Q15485     | Ficolin-2                                                                              | FCN2     |
| 213 Q15517     | Corneodesmosin                                                                         | CDSN     |
| 214 Q15582     | Transforming growth factor-beta-inducible protein 3                                    | TGFB1    |
| 215 Q16610     | Extracellular matrix protein 1                                                         | ECM1     |
| 216 Q4LDE5     | Sushi, von Willebrand factor type A, domain 1<br>pentraxin domain-containing protein 1 | SVEP1    |
| 217 Q6Q788     | Apolipoprotein A-V                                                                     | APOA5    |
| 218 Q86UX7     | Fermitin family homolog 3                                                              | FERMT3   |
| 219 Q8IZ83     | Aldehyde dehydrogenase family 16 member A1                                             | ALDH16A1 |
| 220 Q8TDL5     | BPI fold-containing family B member 1                                                  | BPIFB1   |
| 221 Q8WWZ8     | Oncoprotein-induced transcript 3 protein                                               | OIT3     |
| 222 Q92496     | Complement factor H-related protein 4                                                  | CFHR4    |
| 223 Q92954     | Proteoglycan 4                                                                         | PRG4     |
| 224 Q96IY4     | Carboxypeptidase B2                                                                    | CPB2     |
| 225 Q96KN2     | Beta-Ala-His dipeptidase                                                               | CNDP1    |

|            |                                     |           |
|------------|-------------------------------------|-----------|
| 226 Q96P63 | Serpin B12                          | SERPINB12 |
| 227 Q96PD5 | N-acetylmuramoyl-L-alanine amidase  | PGLYRP2   |
| 228 Q9BWP8 | Collectin-11                        | COLEC11   |
| 229 Q9BXR6 | Complement factor H-related protein | CFHR5     |
| 230 Q9UGM5 | Fetuin-B                            | FETUB     |
| 231 Q9UHG3 | Prenylcysteine oxidase 1            | PCYOX1    |
| 232 Q9Y490 | Talin-1                             | TLN1      |
| 233 Q9Y6R7 | IgGFc-binding protein               | FCGBP     |

### Vesiclepedia Top 100

(accessed 03.12.20)

- 1 PDCD6IP
- 2 GAPDH
- 3 HSPA8
- 4 ACTB
- 5 ANXA2
- 6 CD9
- 7 PKM
- 8 HSP90AA1
- 9 ENO1
- 10 ANXA5
- 11 HSP90AB1
- 12 CD63
- 13 YWHAZ
- 14 YWHAE
- 15 EEF1A1
- 16 PGK1
- 17 CLTC
- 18 PPIA
- 19 SDCBP
- 20 ALDOA
- 21 EEF2
- 22 ALB
- 23 TPI1
- 24 VCP
- 25 CFL1
- 26 MSN
- 27 ATP1A1
- 28 PRDX1
- 29 MYH9
- 30 EZR
- 31 CD81
- 32 ANXA6
- 33 FLOT1
- 34 YWHAB
- 35 LDHB
- 36 SLC3A2
- 37 GNB1
- 38 PFN1
- 39 TSG101

### ExoCarta Top 100

(accessed 03.12.20)

- CD9
- HSPA8
- PDCD6IP
- GAPDH
- ACTB
- ANXA2
- CD63
- SDCBP
- ENO1
- HSP90AA1
- TSG101
- PKM
- LDHA
- EEF1A1
- YWHAZ
- PGK1
- EEF2
- ALDOA
- HSP90AB1
- ANXA5
- FASN
- YWHAE
- CLTC
- CD81
- ALB
- VCP
- TPI1
- PPIA
- MSN
- CFL1
- PRDX1
- PFN1
- RAP1B
- ITGB1
- HSPA5
- SLC3A2
- HIST1H4A
- GNB2
- ATP1A1

|             |          |
|-------------|----------|
| 40 YWHAQ    | YWHAQ    |
| 41 GNAI2    | FLOT1    |
| 42 CLIC1    | FLNA     |
| 43 ANXA1    | CLIC1    |
| 44 ITGB1    | CDC42    |
| 45 LDHA     | CCT2     |
| 46 FASN     | A2M      |
| 47 CDC42    | YWHAG    |
| 48 RAP1B    | TUBA1B   |
| 49 CCT2     | RAC1     |
| 50 YWHAG    | LGALS3BP |
| 51 GNB2     | HSPA1A   |
| 52 ACTN4    | GNAI2    |
| 53 RAB5C    | ANXA1    |
| 54 C3       | RHOA     |
| 55 RAB10    | MFGE8    |
| 56 HIST1H4A | PRDX2    |
| 57 KRT1     | GDI2     |
| 58 FN1      | EHD4     |
| 59 AHCY     | ACTN4    |
| 60 A2M      | YWHAB    |
| 61 BSG      | RAB7A    |
| 62 ACTN1    | LDHB     |
| 63 ANXA7    | GNAS     |
| 64 ACLY     | TFRC     |
| 65 HIST1H4B | RAB5C    |
| 66 GDI2     | ARF1     |
| 67 FLNA     | ANXA6    |
| 68 UBA1     | ANXA11   |
| 69 GNAS     | ACTG1    |
| 70 GSN      | KPNB1    |
| 71 CCT4     | EZR      |
| 72 RAN      | ANXA4    |
| 73 PRDX2    | ACLY     |
| 74 RHOA     | TUBA1C   |
| 75 CCT3     | RAB14    |
| 76 RAC1     | HIST2H4A |
| 77 LGALS3BP | GNB1     |
| 78 TCP1     | UBA1     |
| 79 KRT10    | THBS1    |
| 80 CAP1     | RAN      |
| 81 RAB7A    | RAB5A    |
| 82 TUBB4B   | PTGFRN   |
| 83 HSPA5    | CCT5     |
| 84 IQGAP1   | CCT3     |
| 85 GPI      | BSG      |
| 86 RALA     | AHCY     |
| 87 KPNB1    | RAB5B    |
| 88 HIST1H4I | RAB1A    |
| 89 TFRC     | LAMP2    |

|              |          |
|--------------|----------|
| 90 EIF4A1    | ITGA6    |
| 91 HIST4H4   | HIST1H4B |
| 92 CCT8      | GSN      |
| 93 TLN1      | FN1      |
| 94 HIST1H4K  | YWHAH    |
| 95 HIST1H4H  | TUBA1A   |
| 96 CCT6A     | TKT      |
| 97 ANXA11    | TCP1     |
| 98 HIST1H4J  | STOM     |
| 99 HIST1H4F  | SLC16A1  |
| 100 HIST1H4D | RAB8A    |

### 20K Venn

| Common in Study,<br>Exocarta & Vesiclepedia (40) | Exocarta vs study (6) | Study vs vesiclepedia (5) |
|--------------------------------------------------|-----------------------|---------------------------|
| 1 CLIC1                                          | THBS1                 | C3                        |
| 2 ACTN4                                          | LAMP2                 | ANXA7                     |
| 3 LDHA                                           | ITGA6                 | MYH9                      |
| 4 PGK1                                           | STOM                  | CAP1                      |
| 5 A2M                                            | RAB14                 | TLN1                      |
| 6 FN1                                            | MFGE8                 |                           |
| 7 TFRC                                           |                       |                           |
| 8 ALDOA                                          |                       |                           |
| 9 ANXA1                                          |                       |                           |
| 10 GAPDH                                         |                       |                           |
| 11 GNAI2                                         |                       |                           |
| 12 ATP1A1                                        |                       |                           |
| 13 ITGB1                                         |                       |                           |
| 14 GSN                                           |                       |                           |
| 15 ENO1                                          |                       |                           |
| 16 PFN1                                          |                       |                           |
| 17 HSP90AA1                                      |                       |                           |
| 18 ANXA6                                         |                       |                           |
| 19 HSPA5                                         |                       |                           |
| 20 HSPA8                                         |                       |                           |
| 21 PKM                                           |                       |                           |
| 22 FLNA                                          |                       |                           |
| 23 CFL1                                          |                       |                           |
| 24 MSN                                           |                       |                           |
| 25 PRDX2                                         |                       |                           |
| 26 GDI2                                          |                       |                           |
| 27 ANXA11                                        |                       |                           |
| 28 RAB7A                                         |                       |                           |
| 29 VCP                                           |                       |                           |
| 30 CD81                                          |                       |                           |
| 31 TPI1                                          |                       |                           |
| 32 RAP1B                                         |                       |                           |
| 33 YWHAE                                         |                       |                           |
| 34 HIST1H4A                                      |                       |                           |
| 35 GNB1                                          |                       |                           |

- 36 GNB2
- 37 PPIA
- 38 YWHAZ
- 39 CLTC
- 40 LGALS3BP

### 100K Venn

| Common in Study,<br>Exocarta & Vesiclepedia (18) | Exocarta vs study (1) | Study vs. Vesiclepedia (4) |
|--------------------------------------------------|-----------------------|----------------------------|
| 1 A2M                                            | STOM                  | C3                         |
| 2 FN1                                            |                       | ACTN1                      |
| 3 TFRC                                           |                       | MYH9                       |
| 4 ALDOA                                          |                       | TLN1                       |
| 5 GAPDH                                          |                       |                            |
| 6 GSN                                            |                       |                            |
| 7 ENO1                                           |                       |                            |
| 8 ANXA2                                          |                       |                            |
| 9 HSPA5                                          |                       |                            |
| 10 HSPA8                                         |                       |                            |
| 11 FLNA                                          |                       |                            |
| 12 ACTB                                          |                       |                            |
| 13 RAP1B                                         |                       |                            |
| 14 HIST1H4A                                      |                       |                            |
| 15 PPIA                                          |                       |                            |
| 16 YWHAZ                                         |                       |                            |
| 17 PRDX1                                         |                       |                            |
| 18 LGALS3BP                                      |                       |                            |
