# Supplementary material for: Circulating microvesicles and exosomes in small cell lung cancer by quantitative proteomics
Source: PubMed Central journal article supplement (PMC8903681; doi:10.1186/s12014-021-09339-5), 2022-01-07
Supplement: 12014_2021_9339_MOESM3_ESM.pdf [file 12014_2021_9339_MOESM3_ESM.pdf]

**Table S2. An overview of the proteins identified in each cluster.** For the **20K sample**, proteins were clustered in 10 distinct clusters based on protein expression patterns in the two groups; control and SCLC patients. For the **100K sample**, proteins were clustered in 12 distinct clusters based on protein expression patterns in the two groups; control and SCLC patients. The proteins are listed in terms of their gene names.

## 20K

| <b>Cluster 1 (n = 42)</b> |          |           |           |
|---------------------------|----------|-----------|-----------|
| SERPINA6                  | PRG4     | CDSN      | HRG       |
| ITGAL                     | SERPINC1 | AZGP1     | C8B       |
| C4BPB                     | ITIH3    | SERPINA7  | SERPINB12 |
| LBP                       | IGHV1-46 | C8A       | CFH       |
| SERPING1                  | IGKV1-33 | F10       | SERPINF2  |
| IGHV3-49                  | SYCP1    | F7        | FCN2      |
| C1QA                      | CPN2     | TGM3      | JUP       |
| APOC1                     | DSC1     | IGHM      | SERPIND1  |
| AGT                       | APOL1    | ANXA2     | IGHV5-51  |
| ECM1                      | IGKC     | ITIH4     |           |
| IGHV2-26                  | IGK      | BTD       |           |
| <b>Cluster 2 (n = 26)</b> |          |           |           |
| SPTA1                     | IGHG3    | HBA1      | FN1       |
| CA1                       | GYP A    | F2        | LCAT      |
| HBD                       | SLC4A1   | APOH      | ANXA6     |
| CD81                      | PLTP     | LCP1      | CAT       |
| F11                       | HLA-DRA  | GSN       | BPIFB1    |
| PLG                       | SPTB     | ICAM1     |           |
| ANK1                      | HBB      | APOC3     |           |
| <b>Cluster 3 (n = 40)</b> |          |           |           |
| CSTA                      | C1QB     | C7        | APOA4     |
| APOE                      | C1S      | CNDP1     | KLKB1     |
| GPX3                      | TGFBI    | AMBP      | C4B       |
| F12                       | PRDX2    | APOF      | IGHV3-23  |
| ITIH2                     | PGLYRP2  | HPR       | C1R       |
| SERPINA5                  | QSOX1    | DSP       | ITIH1     |
| PIP                       | TTR      | IGFALS    | FETUB     |
| VTN                       | RBP4     | PROS1     | ATRN      |
| KNG1                      | HSPB1    | CD5L      | SERPINA4  |
| F13B                      | GC       | LUM       | CLEC3B    |
| <b>Cluster 4 (n = 22)</b> |          |           |           |
| IGHA1                     | IGHG2    | CLU       | C4BPA     |
| APOA1                     | TF       | DSG1      | IGJ       |
| C8G                       | FGG      | IGLC6     | HABP2     |
| CETP                      | IGKV3-20 | SERPINA10 | SHBG      |
| AHSG                      | FGB      | C6        |           |
| PON1                      | CD14     | FGA       |           |
| <b>Cluster 5 (n = 27)</b> |          |           |           |
| CFB                       | APOM     | A1BG      | SAA1      |
| IGHV3-9                   | S100A7   | HPX       | LGALS3BP  |

|                            |          |         |          |
|----------------------------|----------|---------|----------|
| PIGR                       | APOB     | CRP     | CFI      |
| C5                         | ITGB2    | BCHE    | CASP14   |
| S100A9                     | PCYOX1   | C4A     | ORM1     |
| SERPINA1                   | ANPEP    | HP      | A2M      |
| IGHG4                      | ORM2     | C2      |          |
| <b>Cluster 6 (n = 14)</b>  |          |         |          |
| CP                         | C3       | CTSD    | IGM      |
| SAA4                       | SERPINA3 | ANXA1   | C9       |
| IGHV1-24                   | PZP      | ARG1    |          |
| LTF                        | LYZ      | IGHG1   |          |
| <b>Cluster 7 (n = 13)</b>  |          |         |          |
| CAPZA2                     | SLC2A1   | LTBP1   | OIT3     |
| TPI1                       | ACTA1    | COTL1   |          |
| ALDOC                      | GDI2     | GNB1    |          |
| ACTN4                      | MSN      | EEF1A1  |          |
| <b>Cluster 8 (n = 32)</b>  |          |         |          |
| RAB27B                     | GNAI2    | GP1BA   | ANXA11   |
| MMRN1                      | RAB7A    | ITGA2   | ILK      |
| CPN1                       | ITGA2B   | LYN     | APOA5    |
| PTPRJ                      | HLA-A    | ICAM2   | LPA      |
| TFRC                       | PPIA     | FERMT3  | LAMP2    |
| HSPD1                      | VCP      | RAB14   | LRG1     |
| AFM                        | ITGA6    | FCN3    | MPO      |
| PLEK                       | RSU1     | CPB2    | LDHA     |
| <b>Cluster 9 (n = 55)</b>  |          |         |          |
| PNP                        | CD226    | APOC4   | HSP90AA1 |
| FBLN1                      | ACTB     | CAPZA1  | SH3BGRL3 |
| MYH14                      | PKM      | TAGLN2  | YWHAZ    |
| MYH9                       | ARHGDI A | FHOD1   | ATP5A1   |
| CALM3                      | ACTN1    | RAB1B   | TUBB     |
| CAP1                       | ARHGDIB  | GAPDH   | IQGAP2   |
| CLTC                       | ENO1     | NAP1L1  | GPD2     |
| FTL                        | CORO1C   | PRDX6   | GNB2     |
| YWHAE                      | GNA13    | MYL12A  | TUBA4A   |
| CLIC1                      | BIN2     | TPM4    | G6B      |
| CFL1                       | F13A1    | RHOC    | WDR1     |
| SLC44A1                    | ALDOA    | PFN1    | CYB5R3   |
| PGK1                       | SLC25A5  | HSPA5   | MLEC     |
| PTPRC                      | F11R     | ANO6    |          |
| <b>Cluster 10 (n = 43)</b> |          |         |          |
| CPNE                       | ATP5B    | CANX    | RAP1B    |
| F5                         | PF4      | SLC25A3 | VCL      |
| MFGE8                      | HSPA8    | CMTM5   | TLN1     |
| EHD1                       | SLC1A5   | SDPR    | PARVB    |
| HLA-C                      | FLNA     | ATP1A1  | VWF      |
| GP1BB                      | RAB11B   | SLC2A3  | THBS1    |
| HSPA1B                     | CS       | GNAQ    | GP9      |

|          |        |          |       |
|----------|--------|----------|-------|
| VDAC3    | PECAM1 | GSTP1    | CD36  |
| ACTR3    | CAPN1  | ITGB3    | PDIA3 |
| HIST1H4A | ATP2A3 | HLA-B    | ITGB1 |
| IDH2     | STOM   | SERPINB1 |       |

## 100K

### Cluster 1 (n = 12)

|       |       |       |      |
|-------|-------|-------|------|
| HSPA5 | OIT3  | A1BG  | PPIA |
| RBP4  | F13A1 | ACTA1 | TTR  |
| HBA1  | F13B  | ALDOA | A2M  |

### Cluster 2 (n = 13)

|       |        |          |          |
|-------|--------|----------|----------|
| FABP5 | FN1    | FETUB    | SERPINF1 |
| JUP   | APOH   | ANXA2    |          |
| LUM   | ACTB   | SLC4A1   |          |
| HBB   | S100A7 | SERPINA5 |          |

### Cluster 3 (n = 37)

|          |          |          |          |
|----------|----------|----------|----------|
| ITIH2    | C4A      | AHSG     | HSPB1    |
| APOM     | IGHG1    | F11      | FGG      |
| IGFALS   | IGHV3-9  | IGHG2    | FCGBP    |
| FGB      | IGLV3-9  | MASP1    | C8B      |
| IGKV4-1  | IGHG3    | SERPINA4 | FCN2     |
| HRG      | C1S      | GSN      | C1R      |
| FCN3     | TF       | ITIH1    | IGHV3-49 |
| SERPING1 | HPR      | COLEC11  |          |
| FGA      | CETP     | CLEC3B   |          |
| PRDX1    | IGHV5-51 | SERPINA6 |          |

### Cluster 4 (n = 30)

|          |          |         |           |
|----------|----------|---------|-----------|
| SEPP1    | C1QB     | RELN    | IGKV2-24  |
| ENO1     | SERPIND1 | PGLYRP2 | KLKB1     |
| TGFBI    | IGHM     | CD5L    | IGKV3D-11 |
| APOA4    | GC       | C1QA    | C4BPA     |
| IGM      | IGKV3-20 | IGHA1   | IGHV3-64D |
| IGKV1-16 | IGJ      | IGKV1-8 | IGKV2-40  |
| C1QC     | PON1     | PLTP    |           |
| IGLV1-51 | IGLL5    | IGHV6-1 |           |

### Cluster 5 (n = 15)

|          |          |       |          |
|----------|----------|-------|----------|
| IGA2     | SVEP1    | IGLC6 | KNG1     |
| CNDP1    | APOA1    | PROS1 | CPN2     |
| IGLV1-40 | ITIH4    | C4B   | LGALS3BP |
| SERPINC1 | IGKV1-17 | APOL1 |          |

### Cluster 6 (n = 6)

|     |       |       |  |
|-----|-------|-------|--|
| IGK | IGKC  | IGLL1 |  |
| CLU | C4BPB | F12   |  |

### Cluster 7 (n = 20)

|      |     |      |     |
|------|-----|------|-----|
| MYH9 | LYZ | TLN1 | DSP |
|------|-----|------|-----|

|                            |          |           |          |
|----------------------------|----------|-----------|----------|
| TFRC                       | STOM     | SERPINB3  | CST3     |
| HSPA8                      | SAA4     | FBLN1     | APOC1    |
| AQP1                       | F5       | APOC4     | FTL      |
| IGHV1-2                    | RAB6B    | SERPINA7  | APOE     |
| <b>Cluster 8 (n = 11)</b>  |          |           |          |
| AFM                        | LCAT     | PLG       | YWHAZ    |
| FLNA                       | SLC2A1   | VWF       | ECM1     |
| CTSD                       | SERPINF2 | GPX3      |          |
| <b>Cluster 9 (n = 23)</b>  |          |           |          |
| TXN                        | DSG1     | SERPINB12 | C5       |
| CFHR4                      | RAP1B    | PCYOX1    | ITGB3    |
| MYL6                       | CFH      | APOA2     | APOD     |
| CASP14                     | RPS27A   | CSTA      | APOB     |
| CD36                       | CDSN     | PF4       | HPX      |
| TGM3                       | ITGA2B   | HABP2     |          |
| <b>Cluster 10 (n = 45)</b> |          |           |          |
| PRG4                       | APOC3    | C6        | CRP      |
| H2AFV                      | APOC2    | LPA       | CPB2     |
| GGT1                       | DCD      | FERMT3    | CP       |
| C8A                        | ANXA7    | HP        | IGHV1-18 |
| CFHR2                      | GPLD1    | IGD       | PIP      |
| SAA2                       | ALDH16A1 | SAA1      | HIST1H4A |
| AMBP                       | APOA5    | C9        | C2       |
| C7                         | DSC1     | GAPDH     | ORM1     |
| PIGR                       | ITIH3    | IGKV1-33  | APCS     |
| SERPINA3                   | LRG1     | C3        |          |
| CFP                        | BPIFB1   | IGHV2-70D |          |
| CFB                        | CFI      | ANPEP     |          |
| <b>Cluster 11 (n = 13)</b> |          |           |          |
| AZGP1                      | IGHV1-46 | F2        | IGLV3-10 |
| CFHR5                      | LBP      | VTN       |          |
| LTF                        | MASP2    | AGT       |          |
| DMD                        | SERPINA1 | S100A8    |          |
| <b>Cluster 12 (n = 8)</b>  |          |           |          |
| F9                         | CD14     | IGHG4     | C8G      |
| ORM2                       | S100A9   | IGHV3-72  | IGLV2-18 |
