# Supplementary material for: Circulating microvesicles and exosomes in small cell lung cancer by quantitative proteomics
Source: PubMed Central journal article supplement (PMC8903681; doi:10.1186/s12014-021-09339-5), 2022-01-07
Supplement: 12014_2021_9339_MOESM4_ESM.pdf [file 12014_2021_9339_MOESM4_ESM.pdf]

**Table S3: Functional enrichment analysis performed on the significantly differentially expressed proteins.** The significantly differentially expressed proteins were investigated for enrichment of Gene Ontology Biological Processes (GOBP) terms in order to identify biological processes related to the up- and downregulated proteins in SCLC patients for 20K and 100K. The tables depict the GOBP terms related to the up- or downregulated proteins and the corresponding Enrichment Score (ES), p-value, and q-value. Abbreviations – SCLC: Small cell lung cancer, GOBP: Gene Ontology Biological Processes, ES: Enrichment Score.

| <b>↑20K SCLC</b>                                   |           |                |                |
|----------------------------------------------------|-----------|----------------|----------------|
| <b>GOBP term</b>                                   | <b>ES</b> | <b>p-value</b> | <b>q-value</b> |
| Cell-matrix adhesion                               | 3.18      | 0.0003         | 0.0280         |
| Integrin-mediated signaling pathway                | 3.18      | 0.0004         | 0.0280         |
| Cell adhesion                                      | 3.18      | 0.0005         | 0.0280         |
| Extracellular matrix organization                  | 3.18      | 0.0030         | 0.1200         |
| <b>↑100K SCLC</b>                                  |           |                |                |
| <b>GOBP term</b>                                   | <b>ES</b> | <b>p-value</b> | <b>q-value</b> |
| Regulation of complement activation                | 4.95      | <0.0001        | <0.0001        |
| Complement activation, alternative pathway         | 4.95      | <0.0001        | <0.0001        |
| Complement activation                              | 4.95      | 0.0004         | 0.00980        |
| Cytolysis                                          | 4.95      | 0.0006         | 0.0120         |
| Complement activation, classical pathway           | 4.95      | 0.0006         | 0.0120         |
| Lipid transport                                    | 4.56      | <0.0001        | <0.0001        |
| Lipoprotein metabolic process                      | 4.56      | <0.0001        | <0.0001        |
| Triglyceride-rich lipoprotein particle remodelling | 4.56      | <0.0001        | 0.0003         |
| Cholesterol efflux                                 | 4.56      | <0.0001        | 0.0003         |
| Cholesterol homeostasis                            | 4.56      | 0.0002         | 0.0052         |
| Phospholipid efflux                                | 4.56      | 0.0002         | 0.0070         |
| Reverse cholesterol transport                      | 4.56      | 0.0004         | 0.0098         |
| Retinoid metabolic process                         | 4.56      | 0.0046         | 0.0790         |
| <b>↓ 20K SCLC (no enrichment)</b>                  |           |                |                |
| <b>GOBP term</b>                                   | <b>ES</b> | <b>p-value</b> | <b>q-value</b> |
| Platelet degranulation                             | –         | <0.0001        | <0.0001        |
| Negative regulation of endopeptidase activity      | –         | <0.0001        | <0.0001        |
| Blood coagulation                                  | –         | <0.0001        | 0.0006         |
| Hydrogen peroxide catabolic process                | –         | <0.0001        | 0.0006         |
| Extracellular matrix disassembly                   | –         | <0.0001        | 0.0010         |
| Positive regulation of fibrinolysis                | –         | <0.0001        | 0.0011         |
| Blood coagulation                                  | –         | <0.0001        | 0.0015         |
| Bicarbonate transport                              | –         | 0.0001         | 0.0035         |
| Plasminogen activatin                              | –         | 0.0002         | 0.0046         |
| Negative regulation of blood coagulation           | –         | 0.0002         | 0.0075         |
| Actin filament capping                             | –         | 0.0003         | 0.0081         |
| Oxygen transport                                   | –         | 0.0004         | 0.0099         |
| Cellular protein metabolic process                 | –         | 0.0019         | 0.0390         |
| Extracellular matrix organization                  | –         | 0.0078         | >0.05          |
| Lipid transport                                    | –         | 0.0110         | >0.05          |
| ER to Golgi vesicle-mediated transport             | –         | 0.0440         | >0.05          |
| Receptor-mediated endocytosis                      | –         | >0.05          | >0.05          |
| Visual perception                                  | –         | >0.05          | >0.05          |
| Positive regulation of gene expression             | –         | >0.05          | >0.05          |
| Cell adhesion                                      | –         | >0.05          | >0.05          |

| GOBP term                                                    | <i>ES</i> | <i>p-value</i> | <i>q-value</i> |
|--------------------------------------------------------------|-----------|----------------|----------------|
| Proteolysis                                                  | -         | >0.05          | >0.05          |
| <b>↓ 100K SCLC</b>                                           |           |                |                |
| Complement activation                                        | 7.45      | <0.0001        | <0.0001        |
| Complement activation, classical pathway                     | 7.45      | <0.0001        | <0.0001        |
| Proteolysis                                                  | 7.45      | <0.0001        | <0.0001        |
| Receptor-mediated endocytosis                                | 7.45      | <0.0001        | <0.0001        |
| Fc-gamma receptor signaling pathway involved in phagocytosis | 7.45      | 0.0001         | 0.0020         |
| Immune response                                              | 7.45      | 0.0090         | 0.1000         |
| Regulation of immune response                                | 7.45      | 0.0480         | 0.3600         |
| Fc-epsilon receptor signaling pathway                        | 7.45      | 0.0480         | 0.3600         |
| Phagocytosis, engulfment                                     | 4.46      | <0.0001        | <0.0001        |
| Innate immune response                                       | 4.46      | <0.0001        | <0.0001        |
| Positive regulation of B cell activation                     | 4.46      | <0.0001        | 0.0005         |
| Phagocytosis, recognition                                    | 4.46      | <0.0001        | 0.0005         |
| B cell receptor signaling pathway                            | 4.46      | 0.0002         | 0.0027         |
| Defense response to bacterium                                | 4.46      | 0.0330         | 0.2800         |
