# Supplementary material for: Circulating microvesicles and exosomes in small cell lung cancer by quantitative proteomics
Source: PubMed Central journal article supplement (PMC8903681; doi:10.1186/s12014-021-09339-5), 2022-01-07
Supplement: 12014_2021_9339_MOESM5_ESM.pdf [file 12014_2021_9339_MOESM5_ESM.pdf]

**Table S4. Significantly differentially expressed proteins for 20K and 100K comparing SCLC patients to the control group.**

| SCLC   Control (20K pellet) |           |                                              |                     |          |
|-----------------------------|-----------|----------------------------------------------|---------------------|----------|
| Uniprot ID                  | Gene name | Protein name                                 | Log <sub>2</sub> FC | p-value  |
| P02741                      | CRP       | C-reactive protein                           | 3.5                 | 0.0001   |
| P15144                      | ANPEP     | Aminopeptidase N                             | 3.2                 | 0.0004   |
| P0DJI8                      | SAA1      | Serum amyloid A-1 protein                    | 2.4                 | < 0.0001 |
| P02786                      | TFRC      | Transferrin receptor protein 1               | 2.2                 | 0.0003   |
| Q08380                      | LGALS3BP  | Galectin-3-binding protein                   | 2.2                 | 0.0008   |
| P05164                      | MPO       | Myeloperoxidase                              | 1.2                 | 0.0424   |
| Q9UHG3                      | PCYOX1    | Prenylcysteine oxidase 1                     | 1.1                 | 0.0447   |
| Q13418                      | ILK       | Integrin-linked protein kinase               | 1.0                 | 0.0140   |
| P02763                      | ORM1      | Alpha-1-acid glycoprotein 1                  | 1.0                 | 0.0011   |
| P23229                      | ITGA6     | Integrin alpha-6                             | 1.0                 | 0.0193   |
| P04114                      | APOB      | Apolipoprotein B                             | 1.0                 | 0.0019   |
| P00738                      | HP        | Haptoglobin                                  | 0.9                 | 0.0004   |
| P50995                      | ANXA11    | Annexin A11                                  | 0.9                 | 0.0345   |
| Q13201                      | MMRN1     | Multimerin-1                                 | 0.9                 | 0.0136   |
| P02750                      | LRG1      | Leucine-rich alpha-2-glycoprotein            | 0.9                 | 0.0146   |
| P17301                      | ITGA2     | Integrin alpha-2                             | 0.8                 | 0.0388   |
| P08514                      | ITGA2B    | Integrin alpha-IIb                           | 0.7                 | 0.0163   |
| P51149                      | RAB7A     | Ras-related protein Rab-7a                   | 0.6                 | 0.0432   |
| P00338                      | LDHA      | L-lactate dehydrogenase A chain              | 0.6                 | 0.0304   |
| P13598                      | ICAM2     | Intercellular adhesion molecule 2            | 0.6                 | 0.0031   |
| P01011                      | SERPINA3  | Alpha-1-antichymotrypsin                     | 0.5                 | 0.0100   |
| P01009                      | SERPINA1  | Alpha-1-antitrypsin                          | 0.5                 | 0.0147   |
| P06681                      | C2        | Complement C2                                | 0.5                 | 0.0240   |
| P01031                      | C5        | Complement C5                                | 0.5                 | 0.0086   |
| P13473                      | LAMP2     | Lysosome-associated membrane glycoprotein 2  | 0.5                 | 0.0113   |
| P00450                      | CP        | Ceruloplasmin                                | 0.4                 | 0.0476   |
| P19827                      | ITIH1     | Inter-alpha-trypsin inhibitor heavy chain H1 | -0.4                | 0.0218   |
| P00747                      | PLG       | Plasminogen                                  | -0.4                | 0.0326   |
| P51884                      | LUM       | Lumican                                      | -0.4                | 0.0398   |
| Q14019                      | COTL1     | Coactosin-like protein                       | -0.4                | 0.0195   |
| P03952                      | KLKB1     | Plasma kallikrein                            | -0.5                | 0.0053   |
| P05154                      | SERPINA5  | Plasma serine protease inhibitor             | -0.5                | 0.0201   |
| P04004                      | VTN       | Vitronectin                                  | -0.5                | 0.0232   |
| P02765                      | AHSG      | Alpha-2-HS-glycoprotein                      | -0.5                | 0.0367   |
| P02753                      | RBP4      | Retinol-binding protein 4                    | -0.6                | 0.0404   |

|        |          |                                                       |      |          |
|--------|----------|-------------------------------------------------------|------|----------|
| P02749 | APOH     | Beta-2-glycoprotein 1                                 | -0.6 | 0.0088   |
| P01042 | KNG1     | Kininogen-1                                           | -0.6 | 0.0100   |
| P02751 | FN1      | Fibronectin                                           | -0.6 | 0.0034   |
| P55058 | PLTP     | Phospholipid transfer protein                         | -0.7 | 0.0011   |
| Q9UGM5 | FETUB    | Fetuin-B                                              | -0.7 | 0.0000   |
| P11166 | SLC2A1   | Solute carrier family 2                               | -0.7 | 0.0540   |
| P13796 | LCP1     | Plastin-2                                             | -0.8 | 0.0033   |
| P03951 | F11      | Coagulation factor XI                                 | -0.8 | 0.0116   |
| P68133 | ACTA1    | Actin, alpha skeletal muscle                          | -0.9 | 0.0051   |
| P05160 | F13B     | Coagulation factor XIII B chain                       | -0.9 | < 0.0001 |
| P05452 | CLEC3B   | Tetranectin                                           | -0.9 | < 0.0001 |
| P29622 | SERPINA4 | Kallistatin                                           | -0.9 | 0.0014   |
| Q96PD5 | PGLYRP2  | N-acetylmuramoyl-L-alanine amidase                    | -1.0 | < 0.0001 |
| P06396 | GSN      | Gelsolin                                              | -1.0 | < 0.0001 |
| O00391 | QSOX1    | Sulfhydryl oxidase 1                                  | -1.1 | 0.0052   |
| P02724 | GYPA     | Glycophorin-A                                         | -1.1 | 0.0046   |
| P06727 | APOA4    | Apolipoprotein A-IV                                   | -1.1 | 0.0001   |
| P00915 | CA1      | Carbonic anhydrase 1                                  | -1.2 | 0.0028   |
| P32119 | PRDX2    | Peroxiredoxin-2                                       | -1.2 | 0.0351   |
| P69905 | HBA1     | Hemoglobin subunit alpha                              | -1.2 | 0.0002   |
| Q15582 | TGFBI    | Transforming growth factor-beta-induced protein ig-h3 | -1.2 | < 0.0001 |
| P02730 | SLC4A1   | Band 3 anion transport protein                        | -1.6 | 0.0001   |
| P68871 | HBB      | Hemoglobin subunit beta                               | -1.6 | < 0.0001 |
| P02042 | HBD      | Hemoglobin subunit delta                              | -1.7 | < 0.0001 |
| P16157 | ANK1     | Ankyrin-1                                             | -2.6 | 0.0233   |
| P11277 | SPTB     | Spectrin beta chain erythrocytic                      | -2.7 | 0.0502   |
| P02549 | SPTA1    | Spectrin alpha chain erythrocytic 1                   | -3.2 | 0.0106   |

**SCLC | Control (100K)**

| <b>Uniprot ID</b> | <b>Gene name</b> | <b>Protein name</b>                   | <b>Log<sub>2</sub> FC</b> | <b>p-value</b> |
|-------------------|------------------|---------------------------------------|---------------------------|----------------|
| P0DJI9            | SAA2             | Serum amyloid A-2 protein             | 3.3                       | 0.0016         |
| P0DJI8            | SAA1             | Serum amyloid A-1 protein             | 2.9                       | < 0.0001       |
| P02655            | APOC2            | Apolipoprotein C-II                   | 2.8                       | 0.0062         |
| P15144            | ANPEP            | Aminopeptidase N                      | 2.4                       | 0.0006         |
| P08519            | LPA              | Apolipoprotein(a)                     | 1.4                       | 0.0346         |
| Q92496            | CFHR4            | Complement factor H-related protein 4 | 1.2                       | 0.0005         |
| P02741            | CRP              | C-reactive protein                    | 1.2                       | 0.0467         |
| P02750            | LRG1             | Leucine-rich alpha-2-glycoprotein     | 1.2                       | 0.00006        |
| P00738            | HP               | Haptoglobin                           | 1.2                       | < 0.0001       |

|            |           |                                              |      |          |
|------------|-----------|----------------------------------------------|------|----------|
| P04114     | APOB      | Apolipoprotein B                             | 1.1  | 0.00002  |
| Q06033     | ITIH3     | Inter-alpha-trypsin inhibitor heavy chain H3 | 0.9  | 0.0012   |
| P01011     | SERPINA3  | Alpha-1-antichymotrypsin                     | 0.8  | < 0.0001 |
| P02748     | C9        | Complement component C9                      | 0.7  | < 0.0001 |
| Q6Q788     | APOA5     | Apolipoprotein A-V                           | 0.7  | 0.0165   |
| P60660     | MYL6      | Myosin light polypeptide 6                   | 0.7  | 0.0220   |
| P02652     | APOA2     | Apolipoprotein A-II                          | 0.7  | 0.0521   |
| P61224     | RAP1B     | Ras-related protein Rap-1b                   | 0.6  | 0.0234   |
| P00751     | CFB       | Complement factor B                          | 0.6  | 0.0003   |
| P62979     | RPS27A    | Ubiquitin-40S ribosomal protein S27a         | 0.5  | 0.0427   |
| Q96P63     | SERPINB12 | Serpin B12                                   | 0.5  | 0.0397   |
| P01040     | CSTA      | Cystatin-A                                   | 0.5  | 0.0481   |
| Q15517     | CDSN      | Corneodesmosin                               | 0.5  | 0.0244   |
| P13671     | C6        | Complement component C6                      | 0.5  | 0.0265   |
| Q96IY4     | CPB2      | Carboxypeptidase B2                          | 0.4  | 0.0428   |
| P05090     | APOD      | Apolipoprotein D                             | 0.4  | 0.0410   |
| P02763     | ORM1      | Alpha-1-acid glycoprotein 1                  | 0.4  | 0.0474   |
| P01031     | C5        | Complement C5                                | 0.3  | 0.0052   |
| P07357     | C8A       | Complement component C8 alpha chain          | 0.3  | 0.0505   |
| P04004     | VTN       | Vitronectin                                  | 0.3  | 0.0346   |
| P19827     | ITIH1     | Inter-alpha-trypsin inhibitor heavy chain H1 | -0.3 | 0.0504   |
| B9A064     | IGLL5     | Immunoglobulin lambda-like polypeptide 5     | -0.4 | 0.0204   |
| P19823     | ITIH2     | Inter-alpha-trypsin inhibitor heavy chain H2 | -0.5 | 0.0052   |
| P01619     | IGKV3-20  | Immunoglobulin kappa variable 3-20           | -0.5 | 0.0111   |
| A0A0C4DH68 | IGKV2-24  | Immunoglobulin kappa variable 2-24           | -0.5 | 0.0188   |
| P01023     | A2M       | Alpha-2-macroglobulin                        | -0.5 | 0.0110   |
| P03952     | KLKB1     | Plasma kallikrein                            | -0.6 | 0.0152   |
| P02753     | RBP4      | Retinol-binding protein 4                    | -0.6 | 0.0097   |
| P01782     | IGHV3-9   | Immunoglobulin heavy variable 3-9            | -0.6 | 0.0063   |
| P06727     | APOA4     | Apolipoprotein A-IV                          | -0.6 | 0.0109   |
| A0A0J9YX35 | IGHV3-64D | Immunoglobulin heavy variable 3-64D          | -0.6 | 0.0018   |
| P02747     | C1QC      | Complement C1q subcomponent subunit C        | -0.7 | 0.0285   |
| P02766     | TTR       | Transthyretin                                | -0.7 | 0.0007   |
| A0A0C4DH67 | IGKV1-8   | Immunoglobulin kappa variable 1-8            | -0.7 | 0.0016   |
| P06396     | GSN       | Gelsolin                                     | -0.7 | 0.0001   |
| P02751     | FN1       | Fibronectin                                  | -0.7 | 0.0091   |
| P68133     | ACTA1     | Actin, alpha skeletal muscle                 | -0.8 | 0.0158   |
| P04196     | HRG       | Histidine-rich glycoprotein                  | -0.8 | 0.0002   |
| P09871     | C1S       | Complement C1s subcomponent                  | -0.8 | 0.0028   |

|            |          |                                          |      |          |
|------------|----------|------------------------------------------|------|----------|
| P01871     | IGHM     | Ig mu chain C region                     | -0.9 | 0.0018   |
| A0A0A0MS15 | IGHV3-49 | Immunoglobulin heavy variable 3-49       | -0.9 | 0.0243   |
| P68871     | HBB      | Hemoglobin subunit beta                  | -0.9 | 0.0003   |
| P01860     | IGHG3    | Ig gamma-3 chain C region                | -0.9 | 0.0009   |
| P02765     | AHSG     | Alpha-2-HS-glycoprotein                  | -0.9 | 0.0004   |
| P02746     | C1QB     | Complement C1q subcomponent subunit B    | -0.9 | 0.0040   |
| P01859     | IGHG2    | Ig gamma-2 chain C region                | -0.9 | < 0.0001 |
| P00736     | C1R      | Complement C1r subcomponent              | -1.0 | 0.0077   |
| Q06830     | PRDX1    | Peroxiredoxin-1                          | -1.0 | 0.0203   |
| P05160     | F13B     | Coagulation factor XIII B chain          | -1.0 | 0.0060   |
| P48740     | MASP1    | Mannan-binding lectin serine protease 1  | -1.1 | 0.0067   |
| P02745     | C1QA     | Complement C1q subcomponent subunit A    | -1.1 | 0.0005   |
| P00488     | F13A1    | Coagulation factor XIII A chain          | -1.1 | 0.0003   |
| P00739     | HPR      | Haptoglobin-related protein              | -1.1 | 0.0002   |
| Q8WWZ8     | OIT3     | Oncoprotein-induced transcript 3 protein | -1.2 | 0.0052   |
| P03951     | F11      | Coagulation factor XI                    | -1.3 | 0.0001   |
| Q9Y6R7     | FCGBP    | IgG Fc-binding protein                   | -1.4 | 0.0333   |
| P69905     | HBA1     | Hemoglobin subunit alpha                 | -1.4 | < 0.0001 |
| Q15485     | FCN2     | Ficolin-2                                | -1.5 | < 0.0001 |
| P06312     | IGKV4-1  | Ig kappa chain V-IV region               | -3.0 | < 0.0001 |

---
