# Supplementary material for: Circulating microvesicles and exosomes in small cell lung cancer by quantitative proteomics
Source: PubMed Central journal article supplement (PMC8903681; doi:10.1186/s12014-021-09339-5), 2022-01-07
Supplement: 12014_2021_9339_MOESM6_ESM.pdf [file 12014_2021_9339_MOESM6_ESM.pdf]

Table S5. Potential diagnostic markers for 20K and 100K samples.

| 20K SCLC   Control  |      |           |                 |                 |                 |                     |
|---------------------|------|-----------|-----------------|-----------------|-----------------|---------------------|
| Protein             | AUC  | 95% CI    | <i>p</i> -value | Sensitivity (%) | Specificity (%) | Log <sub>2</sub> FC |
| CRP                 | 0.97 | 0.90-1.00 | 0.0002          | 94              | 88              | 3.5                 |
| GSN                 | 0.93 | 0.85-1.00 | <0.0001         | 92              | 86              | -1.0                |
| ANPEP               | 0.91 | 0.80-1.00 | 0.0006          | 89              | 100             | 3.3                 |
| TGFBI               | 0.90 | 0.81-1.00 | <0.0001         | 83              | 91              | -1.3                |
| HBD                 | 0.87 | 0.76-0.97 | <0.0001         | 78              | 83              | -1.7                |
| HBB                 | 0.84 | 0.73-0.95 | <0.0001         | 79              | 75              | -1.7                |
| SAA1                | 0.83 | 0.71-0.96 | 0.0001          | 82              | 82              | 2.4                 |
| PGLYRP              | 0.82 | 0.70-0.94 | 0.0001          | 71              | 79              | -1.0                |
| TFRC                | 0.80 | 0.67-0.94 | 0.0009          | 65              | 95              | 2.2                 |
| LGALS3BP            | 0.79 | 0.65-0.93 | 0.0006          | 83              | 78              | 2.2                 |
| 100K SCLC   Control |      |           |                 |                 |                 |                     |
| IGKV4-1             | 0.98 | 0.95-1.00 | <0.0001         | 96              | 92              | -3.0                |
| FCN2                | 0.90 | 0.82-0.99 | <0.0001         | 78              | 92              | -1.5                |
| F11                 | 0.90 | 0.80-1.00 | 0.0004          | 89              | 83              | -1.3                |
| HBA1                | 0.88 | 0.77-0.99 | <0.0001         | 87              | 88              | -1.4                |
| SAA2                | 0.89 | 0.76-1.00 | 0.0011          | 85              | 100             | 3.3                 |
| HP                  | 0.88 | 0.77-0.98 | <0.0001         | 78              | 83              | 1.2                 |
| CFHR4               | 0.82 | 0.67-0.97 | 0.0022          | 81              | 77              | 1.2                 |
| SAA1                | 0.84 | 0.73-0.96 | <0.0001         | 74              | 79              | 2.9                 |
| ANPEP               | 0.84 | 0.71-0.97 | 0.0003          | 70              | 84              | 2.4                 |
| F13A1               | 0.82 | 0.69-0.96 | 0.0005          | 79              | 76              | -1.1                |
